# Supplementary material for: Tropospheric Ozone Seasonal and Long-term Variability as seen by lidar and surface measurements at the JPL-Table Mountain Facility, California
Source: Copernicus journal article supplement (doi:10.5194/acp-2016-70), 2016-02-23

1       Tropospheric Ozone Seasonal and Long-term Variability as seen by lidar and  
2            surface measurements at the JPL-Table Mountain Facility, California

3                           M. J. Granados-Muñoz and T. Leblanc

4                           Jet Propulsion Laboratory, California Institute of Technology

5

6

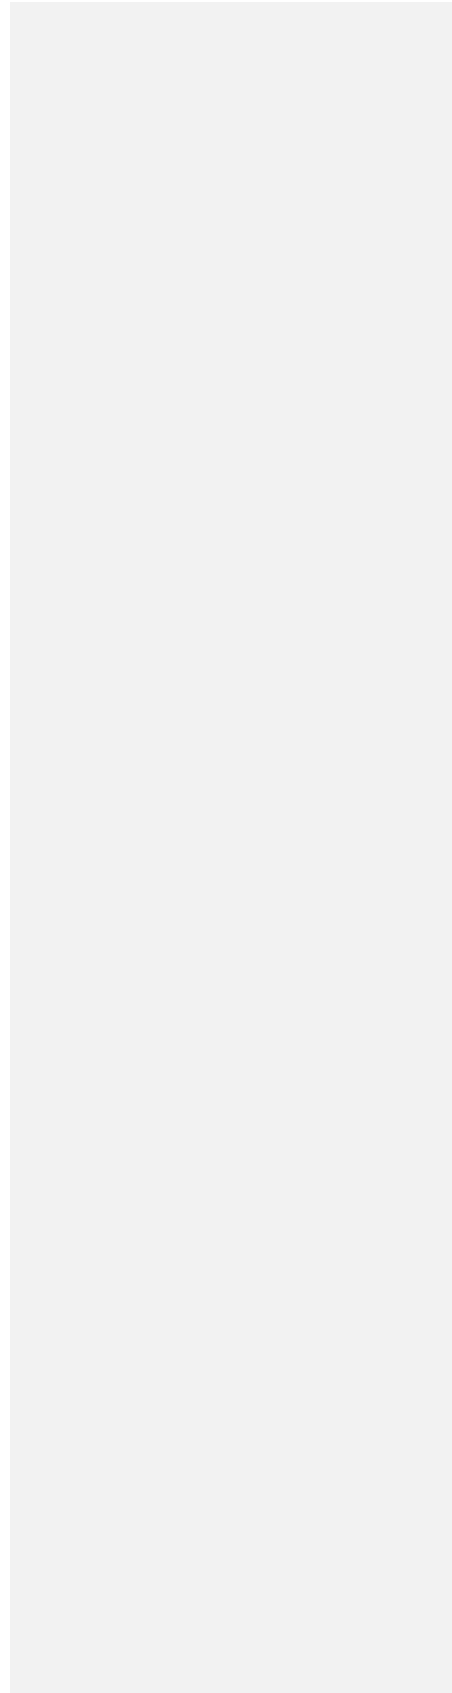

7            Abstract

8            A combined surface and tropospheric ozone climatology and interannual variability study  
9 was performed for the first time using co-located ozone photometer measurements (2013-2015)  
10 and tropospheric ozone differential absorption lidar measurements (2000-2015) at the Jet  
11 Propulsion Laboratory Table Mountain Facility (TMF, elev. 2285 m), in California.

12           The surface time-series were investigated both in terms of seasonal and diurnal variability.  
13 The observed surface ozone is typical of high-elevation remote-sites, with small amplitude of the  
14 seasonal and diurnal cycles, and high ozone values, compared to neighboring lower altitude  
15 stations representative of urban boundary layer conditions. The ozone mixing ratio ranges from  
16 45 ppbv in the winter morning hours to 65 ppbv in the spring and summer afternoon hours. At  
17 the time of the lidar measurements (early night), the seasonal cycle observed at the surface is  
18 similar to that observed by lidar between 3.5 km and 9 km.

19           Above 9 km, the local tropopause height variation with time and season impacts significantly  
20 the ozone lidar observations. The frequent tropopause folds found in the vicinity of TMF (27%  
21 of the time in winter and spring) produce a dual-[peak](#) vertical structure in ozone within the fold  
layer,  
22 characterized by higher-than-average values in the bottom half of the fold (12-14 km), and  
23 lower-than-averaged values in the top half of the fold (14-18 km). This structure is consistent  
24 with the expected origin of the air parcels within the fold, i.e., mid-latitude stratospheric air  
25 folding down below the upper tropospheric sub-tropical air.

26           No significant signature of interannual variability could be observed on the 2000-2015  
27 deseasonalized lidar time-series, with only a statistically non-significant positive anomaly during  
28 the years 2003-2007. Our trend analysis reveals however a statistically significant positive trend  
29 of  $0.34 \pm 0.06$  ppbv.year<sup>-1</sup> ([0.6%](#)) in the free troposphere ([7-10 km](#)) for the period 2000-2015.

30           A classification of the air parcels sampled by lidar was made at 1-km intervals [s](#) between 5 km  
31 and 14 km altitude, using 8-days backward trajectories (HYSPLIT). Our classification revealed  
32 the large influence of the Pacific Ocean, with air parcels of low ozone content (50-65 ppbv), and  
33 significant influence of the stratosphere leading to ozone values of 65-80 ppbv down to 8-9 km.  
34 In summer, enhanced ozone values (70 ppbv) were found in air parcels originating from Central

35 America, probably ~~owed~~ due to the enhanced thunderstorm activity during the North American

36 Monsoon. No outstanding influence from Asia was identified. [.<see comments in review>](#)

37

38 1. Introduction

39 Ozone is an important constituent in the troposphere, impacting climate, chemistry, and air  
40 quality (The Royal Society, 2008). As a greenhouse gas (Forster et al., 2007), it contributes to  
41 the Earth's global warming with an estimate radiative forcing of  $0.40 \pm 0.20 \text{ W}\cdot\text{m}^{-2}$  (IPCC 2013).  
42 It is one of the main oxidants in the troposphere (Monks, 2005), and, in high concentrations, it  
43 can cause problems in human health and vegetation (World Health Organization, 2003).  
44 Tropospheric ozone can be directly emitted to the troposphere [<how? Is there really a direct  
tropospheric emission source besides the stratosphere mentioned below?>](#), but it is primarily  
formed as a  
45 secondary pollutant in chemical reactions involving ozone precursors such as methane, CO,  
46 NO<sub>x</sub>, VOCs or PANs. An additional source of ozone in the troposphere is the downward  
47 transport from the stratosphere, where ozone is much more abundant (Levy et al., 1985). At high  
48 elevation sites such as the Jet Propulsion Laboratory Table Mountain Facility in Southern  
49 California (TMF hereafter), the effect of the boundary layer is very small, and ozone variability  
50 is expected to be driven by transport processes from the stratosphere or horizontal transport  
51 within the troposphere (Cui et al., 2009; Naja et al., 2003; Trickl et al., 2010).

52 Several studies show that background ozone levels have increased significantly since  
53 preindustrial times (Mickley et al., 2001; Parrish et al., 2012; Staehelin et al., 1994; Volz and  
54 Kley, 1988) and these levels continued rising in the last decades in both Hemispheres (Derwent  
55 et al., 2007; Jaffe et al., 2004; Lee and Akimoto, 1998; Naja and Akimoto, 2004; Oltmans et al.,  
56 2006; Parrish et al., 2012; Simmonds et al., 2004; Tanimoto et al., 2009; Zbinden et al., 2006;  
57 Lelieveld et al., 2004). Nevertheless, after air quality regulations were implemented in the 1970s,  
58 the increasing trend has slowed down or is even [reverted-reversed](#) in regions such as the Eastern  
U.S. and  
59 Europe (Cooper et al., 2012, 2014; Granier et al., 2011). The situation is not the same for  
60 emerging economies such as Asia, where emissions are increasing with [the a](#) corresponding  
61 increase in ozone levels (Dufour et al., 2010; Gao et al., 2005; Strode et al., 2015; Tie et al.,  
62 2009; Wang et al., 2006).

63 In most cases, variability and trend studies have revealed very large ozone variability with  
64 time, location and altitude (Cooper et al., 2014). This variability is mostly due to the large  
65 heterogeneity and variability of the ozone sources themselves, the different chemical processes  
66 affecting the formation and depletion of tropospheric ozone and its variable lifetime in the  
67 troposphere. Ozone atmospheric lifetime goes from a few hours in polluted boundary layer to

68 several weeks in the free troposphere, allowing it to travel over distances of intercontinental  
69 scale (Stevenson et al., 2006; Young et al., 2013). In order to obtain statistically significant  
70 results and be able to assess tropospheric ozone interannual variability and trends, a large long-  
71 term monitoring dataset with global coverage is required, ~~which~~ [Such a dataset](#) has not yet  
72 been achieved [with](#)  
[considering the](#) current observation capabilities.

73 Long-term records of tropospheric ozone are available since the 1950s (Feister and Warmbt,  
74 1987; Parrish et al., 2012), but it is not until the 1970s that the number of ozone monitoring  
75 stations became significant (Cooper et al., 2014 and references therein). Currently, a  
76 considerable number of ozone monitoring sites are operating as part of regional networks or  
77 international programs (e.g., World Meteorological Observation Global Atmosphere Watch  
78 WMO/GAW, Acid Deposition Monitoring Network in East Asia EANET, Clean Air Status and  
79 Trends Network CASTNET, etc.). In addition to these ground-based networks, tropospheric  
80 ozone measurements from satellite (TOMS, TES, OMI, etc.) or aircraft (MOZAIC/IAGOS)  
81 platforms have been successfully implemented. Nevertheless, most of the tropospheric ozone  
82 measurements are still only surface or column-integrated measurements whilst the number of  
83 them with information on the vertical coordinate is very ~~scarce~~ [small](#). Until ~~today~~ [recently](#), mainly  
84 ozonesonde  
85 profiles have been used to provide altitude-resolved ozone variability information in the  
86 troposphere (Logan, 1994; Logan et al., 1999; Naja and Akimoto, 2004; Oltmans et al., 1998,  
87 2006, 2013, [[Newchurch et al., 2003](#)]), but the ~~somewhat elevated~~  
88 launch has kept the sampling  
89 interval to one profile per week (or less) for ~~a given~~ [most](#) locations. Differential Absorption  
90 Lidar  
91 (DIAL) systems, which started to be used to measure tropospheric ozone in the late 1970s  
92 (Bufton et al., 1979, [[Proffitt and Langford, 1997](#)]), complement the ozonesonde records,  
93 providing higher temporal resolution  
94 thanks to their inherent operational configuration (from minutes to days of continuous  
95 measurements). ~~Today~~ [Currently](#), tropospheric ozone lidars are still very scarce, but the  
96 implementation of  
97 observation networks such as the international Network for the Detection of Atmospheric  
98 Composition Change (NDACC, <http://www.ndsc.ncep.noaa.gov>), and more recently the North  
99 American-based Tropospheric Ozone Lidar Network (TOLNet, [http://www-  
air.larc.nasa.gov/missions/TOLNet](http://www-air.larc.nasa.gov/missions/TOLNet)) allows for new capabilities that can contribute to the  
understanding of processes affecting tropospheric ozone variability, and to satellite and model  
validation and improvement.

Formatted: Font color: Blue

Formatted: Font color: Blue

Formatted: Font color: Blue

98 As part of NDACC and TOLNet, a tropospheric ozone DIAL system located at TMF has  
99 been operating since 1999. In this study, an analysis of 16 years of lidar profiles measured at the  
100 station is presented together with the analysis of the surface ozone measurements available at the  
101 site since 2013. The objective is to provide the first-ever published study of tropospheric ozone  
102 variability above TMF using both the surface and lidar datasets. The work presented here is  
103 particularly valuable due to the rising interest in the detection of long-term trends in the Western  
104 United States (U.S.) and the scarcity of long-term measurements of ozone vertical profiles in this  
105 region. The high—terrain elevation and the deep planetary boundary layer of the  
106 intermountain Western U.S. region facilitate inflow of polluted air masses originating in the  
107 Asian boundary layer and ozone-rich stratospheric air down to the surface; thus, highly  
108 influencing air quality in the region (Brown-Steiner and Hess, 2011; Cooper et al., 2004;  
109 Langford et al., 2012; Liang et al., 2004; Lin et al., 2012a, 2012b; Stohl, 2002). After a brief  
110 description of the instrumentation and datasets (Section 2), an analysis of the seasonal and  
111 interannual variability of tropospheric ozone above TMF for the period 2000-2015 will be  
112 presented in section 3. The study includes a characterization of the air parcels sampled by lidar  
113 by identification of the source regions based on backward trajectories analysis. A summary and  
discussion are provided in Section 4.

## 114 2. Instrumentation

### 115 2.1 Tropospheric ozone lidar

116 TMF is located in the San Gabriel Mountains, in Southern California (34.4° N, 117.7° W), at an  
117 elevation of 2285 m above sea level. Two differential absorption lidars (DIAL) and one Raman  
118 lidar have been operating at the facility during nighttime typically four times per week, two  
119 hours per night, contributing stratospheric ozone, temperature, tropospheric ozone, and water  
120 vapor measurements to NDACC for several decades now. The original design in the mid-1990s  
121 of the tropospheric ozone DIAL was optimized for tropospheric ozone and aerosol measurements  
122 (McDermid, 1991). The system was later re-designed to provide exclusively tropospheric ozone  
123 profiles (McDermid et al., 2002). The emitter uses a quadrupled Nd:YAG laser emitting two  
124 beams at 266 nm. One beam ~~is sent into~~passes through a Raman cell filled with Deuterium  
125 to shift the wavelength to 289 nm, the other beam ~~is sent into~~passes through another cell  
126 filled with Hydrogen to shift the wavelength to 299 nm. The two beams are then expanded  
127 five times and transmitted into the atmosphere. The light elastically backscattered in the  
troposphere (3-20 km) is collected by

128 several ~~<how many? 3?>~~ telescopes comprising mirrors of diameters varying from 91 cm  
129 diameter to 5 cm diameter, thus accommodating for the large signal dynamic range ~~implied~~  
130 ~~occurring~~ when collecting light from this close range. A total of three pairs of 289/299 nm  
131 channels is thus used to retrieve ozone using the DIAL technique, each pair corresponding to a  
132 different intensity range and the retrieved ozone profiles from all pairs combined ~~together~~  
133 ultimately covering the entire troposphere (3-18 km). As part of the retrieval process, the  
134 upper range of the ozone profile is further extended to about 25 km by applying the DIAL  
135 technique on the 299 nm high intensity channel of the tropospheric ozone lidar and the 355  
136 nm low-intensity channel of the co-located water vapor Raman lidar (Leblanc et al., 2012).

137 The instrument temporal sampling can be set to any value from a few seconds to several hours,  
138 depending on the science or validation need. The vertical sampling can be set to any multiple of  
139 7.5 m, ~~again~~ depending on the science or validation need. For the routine measurements  
140 contributing to NDACC over the period 1999-2015 and used for the present work, the standard  
141 settings have typically ranged between 5-min and 20-min for temporal sampling, and between  
142 7.5 m and 75 m for the vertical sampling. Profiles routinely archived at NDACC are averaged  
143 over 2-hours, with an effective vertical resolution varying from 150-m to 3 km, ~~depending~~  
144 ~~on~~ ~~increasing with~~ altitude. These temporal and vertical resolution settings yield a standard  
145 uncertainty of 7-14% throughout the profile. The system operates routinely at nighttime, but  
146 daytime measurements with reduced signal-to-noise ratio are occasionally performed in  
147 special circumstances such as process studies, and aircraft or satellite validation. The total  
148 number of routine 2-hour ozone profiles used in this study and archived at NDACC for the  
149 period 2000-2015 is included in Table 1.

150

[Table 1]

151 The TMF ozone lidar measurements have been regularly validated using simultaneous,  
152 ~~and~~ co-located Electrochemical Concentration Cell (ECC) sonde measurements (Komhyr, 1969;  
153 Smit et al., 2007). In the troposphere the precision of the ozonesonde measurement is ~~around~~  
154 ~~approximately~~ 3- 5% ~~with accuracy of ???~~. TMF has ozonesonde launch capability since 2005  
155 and 32 coincident profiles were obtained over the period 2005-2013. Results from the lidar  
156 and the ECC comparison are included in Figure 1. Figure 1c reveals that the deviations do  
157 not present significant changes with time, which is an indicator of the system stability  
despite the multiple upgrades made over this time

158 period. In most cases, differences were within  $\pm 15\%$  for the complete analyzed period. Note that  
159 a non-negligible fraction of the differences is due to geophysical variability. The measurement  
160 geometry of the lidar and ozonesonde are radically different: 2-hour averaged, single location for  
161 lidar, and horizontally-drifting ~~instantaneous 1-second~~ measurements for the ozonesonde [rising at  
5 m/s](#).

## 162 2.2. Surface ozone measurements

163 Continuous surface ozone measurements have been performed at TMF since 2013 with a  
164 UV photometric ozone analyzer (Model 49i from Thermo Fisher Scientific, US). The operation  
165 principle is based on the absorption of UV light at 254 nm by the ozone molecules. The  
166 instrument collects in-situ air samples at 2 meter above ground taken from an undisturbed  
167 forested environment adjacent to the lidar building. It provides ozone mixing ratio values at 1-  
168 minute time intervals with a lower detection limit of 1 ppbv.

## 169 3. Results

170

### 171 3.1. Surface ozone variability

172 Figure 2a shows the surface ozone seasonal cycle at TMF and nearby stations from the  
173 California Air Resources Board (ARB) air ~~quality~~ network for the period 2013-2015. The  
174 seasonal cycle at TMF comprises a maximum in spring and summer and a minimum in winter,  
175 consistent with the ARB stations shown, as well as other stations in the US West Coast  
176 (e.g., Schnell et al., 2015). Nonetheless, the seasonal cycle obtained at TMF from the hourly  
177 samples (left plot) presents larger ozone values and lower variability throughout the year  
178 compared to the other ARB stations [all of which are lower altitudes](#). The mean surface value for  
179 the complete period at TMF is 55 ppbv, whereas the seasonal values are 57, 57, 52 and 45 ppbv  
180 in spring (March-April-May), summer (June-July- August), fall (September-October-November),  
181 and winter (December-January-February) respectively. These values are in good agreement  
182 with those obtained from surface measurements at high elevation sites in the Northern  
183 Hemisphere and reported in the review by Cooper et al., (2014). When using the 8hMDA (8-h  
184 maximum daily average, right plot), larger seasonal ~~cycle~~ amplitudes [are observed occur](#),  
185 especially at stations affected by anthropogenic pollution such as Crestline or San  
186 Bernardino. These polluted stations present larger values in summer than those recorded at  
high-elevation remote stations like Joshua Tree or TMF. The



187 mean 8hMDA at TMF is 58 ppbv and the seasonal averages are 62, 66, 57 and 49 for spring,  
188 summer, fall and winter, respectively. The observed seasonal variability is typical of high-  
189 elevation remote sites with low urban influence (Brodin et al., 2010). A similar behavior can be  
190 observed at the Phelan, Joshua Tree or the Mojave National Preserve stations, all sites being at  
191 high elevation with low or negligible urban influence. In Figure 2a a secondary minimum is  
192 observed at TMF and most of the ARB nearby stations in July-August, followed by a secondary  
193 maximum in fall.

194 In Figure 2a a clear combined effect of the altitude and proximity to anthropogenic pollution  
195 sources on the ozone levels is observed. In general, higher ozone levels and lower variability are  
196 observed at higher altitudes. The lowest altitude Pico Rivera instrument measures the lowest  
197 ozone levels, and the highest-altitude TMF instrument measures the highest ozone levels  
198 throughout the year when considering the hourly sampled dataset. A mean difference of ~30  
199 ppbv is observed for a 2-km altitude difference. The magnitude of this positive ozone vertical  
200 gradient depends on the distance from anthropogenic pollution sources. The effect of pollution is  
201 clearer on the 8hMDA data, where high-elevation stations, yet more likely to be affected by  
202 pollution such as Crestline or Victorville, present a larger seasonal cycle amplitude associated  
203 with lower ozone levels in winter and higher levels in summer. A similar impact of the interplay  
204 between urban and high-elevation was previously reported by Brodin et al., (2010).

205 The difference between the seasonal cycle retrieved from the 1-hour averaged data and the  
206 8hMDA can be easily explained from the differences in the daily cycles at the different stations.  
207 The mean surface ozone diurnal cycle at TMF and nearby ARB stations is shown in Figure 2b  
208 for the four seasons. Minimum values are observed at nighttime, whereas maxima appear in late  
209 afternoon. As for the seasonal cycle, the daily cycle at TMF, Joshua Tree, Mojave National  
210 Preserve, and Phelan stations exhibit low variability compared to the other stations located at  
211 lower altitude and more affected by urban pollution. On average, daily values are larger at  
212 high-elevation remote sites such as TMF or Joshua Tree. However, the afternoon maximum  
213 is larger at polluted stations such as Crestline, especially in the summer season. In addition, the  
214 maximum at TMF and the ARB stations of Joshua Tree and Mojave National Preserve occurs  
215 later than at the other stations. The difference in timing is likely due to the different chemical  
216 species involved in the ozone formation and depletion processes due to the low influence of  
anthropogenic pollution

217 (Brodin et al., 2010; Gallardo et al., 2000; Naja et al., 2003). In winter, a minimum is observed at  
218 TMF in the afternoon instead of the maximum observed at the other stations. This difference in  
219 diurnal pattern has been observed at other remote or high-elevation sites and has been attributed  
220 to the shorter day length and the lack of ozone precursors compared to urban sites. The resulting  
221 daytime photochemical ozone formation is insufficient to produce an ozone diurnal variation  
222 maximizing in the afternoon (Brodin et al., 2010; Gallardo et al., 2000; Naja et al., 2003;  
223 Oltmans and Komhyr, 1986; Pochanart et al., 1999; Tsutsumi and Matsueda, 2000).

### 224 3.2. tropospheric ozone variability

225 The red curve in ~~Figure 3~~**Figure 3a** (left plot) shows the average tropospheric ozone profile  
226 obtained by the TMF lidar for the period 2000-2015. The cyan horizontal bars show the  
227 corresponding standard deviation at 1-km interval. The red dot at the bottom of the profile shows  
228 the 2013-2015 mean surface ozone obtained from the data acquired simultaneously to the lidar  
229 measurements. The lidar system ~~can~~provides information from ~~around~~approximately 3.5 km  
230 (from 200 meters since 2013) above the surface up to 25 km, covering the whole troposphere  
231 and the lower stratosphere. The average mixing ratio value in the mid-troposphere is 55  
232 ppbv. Above 8 km, the ozone mixing ratio increases, reaching values above ~~1 ppmv~~100 ppbv  
at 16 km.

233 The seasonally averaged profiles are shown in Figure 3b. ~~They~~These averages  
234 represent show larger values in spring and summer in the troposphere, whereas in the  
235 stratosphere maximum values ~~are observed~~occurs in winter and spring. Within the troposphere,  
236 below 9 km, the seasonally-averaged profiles show average values of 62, 60, 51 and 50 ppbv in  
237 spring, summer, fall and winter respectively. These values are in good agreement with the  
238 average ozone concentrations (50-70 ppbv) obtained in previous studies (Thompson et al.,  
239 2007; Zhang et al., 2010) above the western U.S. In the altitude range 9-16 km (UTLS) a  
240 much larger variability in ozone is observed, as indicated by the large standard deviation  
241 (left plot) and the differences between the seasonally-averaged profiles (right plot). This  
242 large variability results from the horizontal and vertical displacement of the tropopause above  
243 the site, causing the lidar to sound either the ozone-rich lowermost stratosphere or the ozone-  
poor sub-tropical upper troposphere for a given altitude.

244 The 2D color contours of Figure 4 show the composite (2000-2015) monthly mean ozone  
245 climatology measured by lidar (main panel, 4-20 km). A similar 2D color contour representation

246 was used just below the main panel to represent the composite (2013-2015) monthly mean  
247 surface ozone. The climatological tropopause height at TMF is also included in the main panel  
248 (blue dotted line), with mean values ranging between 12 and 15 km. As will be discussed later in  
249 this paper, the tropopause height variability is the main cause of the larger standard deviation  
250 observed in Figure 3a in this region. Between the surface and 9 km, a very consistent seasonal  
251 pattern ~~is observed~~ occurs, with maximum values in April-May and minimum values in  
252 winter. The spring-summer maximum in the free-troposphere has been consistently observed at  
253 other stations in Europe and North America and is attributed to photochemical production  
254 (Law et al., 2000; Petetin et al., 2015; Zbinden et al., 2006). Above 9 km, the seasonal  
255 maximum ~~is observed~~ occurs earlier, (i.e., in March and April between 10 and 12 km and  
256 February and March at higher altitudes), consistent with the transition towards a dynamically-  
257 driven lower-stratospheric regime. At these altitudes, the ozone minimum is also displaced  
258 earlier in the year (August-October), which is consistent with the findings of Rao et al. (2003)  
259 above Europe.

260 The TMF surface and lidar data are found to be very consistent, both in terms of seasonal  
261 cycle phase and amplitude, and in term of absolute mixing-ratio values. The mean value  
262 obtained from the lidar measurements in the troposphere is very similar to the mean value  
263 obtained from the surface measurements (around 55 ppbv). This consistency may point out  
264 the fact that the TMF surface measurements are representative of the lower part of the free  
265 troposphere (i.e., below 7 km), at least during the nighttime lidar measurements.

266 The consistency between the lidar and the surface data was found not only for the  
267 seasonal cycle obtained from the monthly averaged values, but also for the complete time series.  
268 The degree of correlation between the lidar measurements at the lowest point and the surface  
269 measurements was investigated. ~~As mentioned before,~~ Although the lidar cannot measure all the  
270 way down to the surface, ~~the~~ the first valid measurement occurs at ~~around~~ 3.5-4 km  
271 depending on the time period. Therefore, the layer from 4 to 6 km is considered as the lower  
272 lidar layer. A correlation coefficient of  $R=0.34$  was found between the lidar data in the layer  
273 from 4 to 6 km and the surface data. The correlation increases somewhat ( $R=0.44$ ) if we  
274 consider a 3-hour time lag between the 4-6 km layer and the surface. After removing outliers  
275 ~~<not legitimate here>~~ corresponding to ozone values higher (or lower) than the  
276 average plus (minus) one standard deviation either at the surface or at 4-6 km, the correlation  
increases up to 0.69 for the simultaneous data and up to 0.79 for the 3-hour time- shift.

Formatted: Highlight

277

### 278 3.3. Interannual variability and trends

279

280 The 2000-2015 time-series of the deseasonalized ozone mixing ratio is shown in Figure  
281 5. Anomalies, expressed in percent, ~~were calculated~~ resulted from ~~by~~ subtracting the  
282 climatological ozone monthly mean profiles computed for the period 2000-2015 ~~to from~~  
283 the measured lidar profiles. Large ozone variability with time is clearly observed, highlighting the  
284 difficulty ~~to in~~ identifying trends and patterns. No clear mode of interannual variability is  
285 observed for the analyzed period here. However, positive anomalies seem to predominate  
286 throughout the troposphere during the period 2003-2007, especially below 7 km. On average,  
287 ozone mixing ratio values in the lower troposphere were 5 ppbv larger in 2003-2007 than  
288 during the entire period 2000-2015.

289 Following a procedure similar to that described in Cooper et al. (2012), a trend analysis  
290 was performed at different altitude levels (Table 2 and Figure 6). Figure 6 shows the time series  
291 of the median, 95<sup>th</sup> and 5<sup>th</sup> percentile values, obtained every year between 2000 and 2015 for  
292 different layers and different seasons using the lidar profiles measured at TMF. ~~In order to obtain~~  
293 ~~the trends,~~ Linear fits (shown in Figure 6) of the median, 95<sup>th</sup> and 5<sup>th</sup> percentiles ~~were~~  
294 performed

295 independently using the least squares method define the trend lines of. ~~The~~ the ozone rate of  
296 change in ppbv.year<sup>-1</sup> ~~was~~  
determined from the slope of the linear fit. To assess the significance of the trends, the F-statistic  
297 test was used, with the p-Value as an indicator of the statistical significance. ~~For p~~ P-Values lower  
298 than 0.1 ~~<Suggest you use 0.05>~~; indicate trends ~~were assumed~~ statistically significant, with a  
confidence level larger than 90%.

299 The calculated trends ~~were found to~~ depend on altitude and season. Table 2 contains the  
300 ozone rate change expressed in ppbv.year<sup>-1</sup> (and %.year<sup>-1</sup>) for the different layers and seasons for  
301 the median, 5<sup>th</sup> and 95<sup>th</sup> percentiles. Statistically significant trends are marked in bold font. The  
302 layer corresponding to the upper troposphere (7-10 km) shows a statistically significant ozone  
303 increase of 0.31 ppbv.year<sup>-1</sup> (0.57%.year<sup>-1</sup>) for the median values and 0.55 ppbv.year<sup>-1</sup>  
304 (0.54%.year<sup>-1</sup>) for the 95<sup>th</sup> percentile, indicating that both the background and the high-  
305 intensity ~~events~~ ozone event levels were increasing (Cooper et al., 2012, 2014). Cooper et  
al. (2012) A similar increase in the free troposphere and in the western US ~~was reported by~~  
Cooper et al. (2012) for the period 1990-  
2010 for both the median and 95<sup>th</sup> percentiles.

306 Now looking at Analyzing each season separately, a significant positive trend ~~was~~  
307 found occurs in the upper troposphere (7-10 km) for both spring and summer, with an ozone

Formatted: Right: 0", Space Before: 0 pt,  
Line spacing: Exactly 14.35 pt

in  
cr  
ea  
si  
n  
g  
ra  
te  
of  
0.  
7  
1

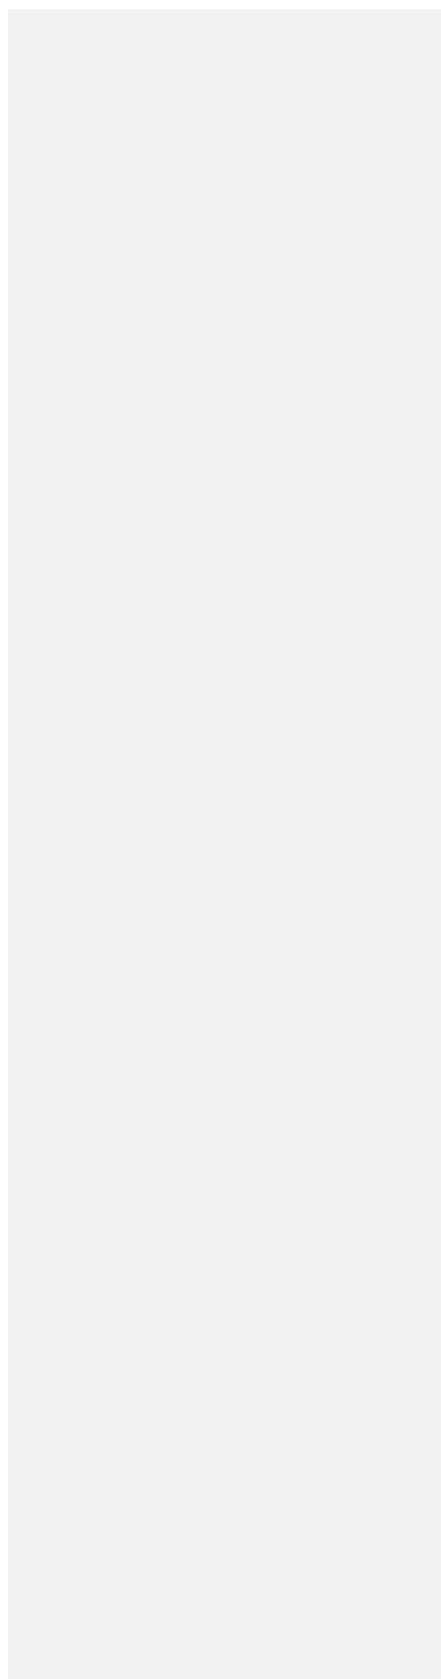

308 and 0.58 ppbv.year<sup>-1</sup> respectively (or 1.10 and 0.98%·year<sup>-1</sup>), and an ozone decrease of -0.43  
309 ppbv.year<sup>-1</sup> (-0.87%·year<sup>-1</sup>) during winter. Whereas a positive trend was obtained on a regional  
310 scale in Cooper et al., (2012) for winter, certain sites in the western U.S. showed ~~a~~-negative  
311 trends. The positive trend ~~obtained here at TMF~~ in spring for the median values is larger  
312 than the trend  
313 obtained by Cooper et al. (2012) for the free troposphere in 1995-2011 (0.41 ppbv.year<sup>-1</sup>), and  
314 even larger than the trend obtained by Lin et al. (2015b) using model ~~data~~calculations (0.37  
315 ppbv.year<sup>-1</sup> during 1995-2012). This disagreement could be due to differences in sampling, as  
316 concluded in Lin et al. (2015b). Nonetheless, Figure 6 shows larger ozone median (and 5<sup>th</sup> and  
317 95<sup>th</sup> percentile) values at 7-10 km in 2013-2015 than in preceding years, with this period ~~not~~  
318 being ~~included~~ in the previous studies. A lower ozone increasing rate in 2000-2012 above  
319 TMF (0.43 ppbv.year<sup>-1</sup>) suggests that that the ozone rate of change has increased in the last  
years, but a more comprehensive study with regional coverage would be necessary to confirm  
the significance of this change.

320 Statistically significant trends were also found in the lower troposphere (4-7 km) during  
321 winter for the median and 5<sup>th</sup> percentile values with an ozone decrease of -0.36 ppbv.year<sup>-1</sup> and -  
322 0.59 ppbv.year<sup>-1</sup> ~~and~~ respectively (-0.72% and -1.53%·year<sup>-1</sup> ~~respectively~~) (Table 2). ~~This-These~~  
323 trends indicates a decrease in the background ozone values. During winter months, a smaller  
324 influence of transboundary ~~ozone~~ transport is expected at low altitudes above TMF and  
325 the decrease in background ozone during these months could be associated with the decrease  
326 in domestic anthropogenic emissions.

327 ~~No significant trend was observed near the tropopause (12-16 km) are not significant;~~  
328 whereas a significant negative trend of -8.879 ppbv.year<sup>-1</sup> (-1.394%·year<sup>-1</sup>) for the median  
329 and -5.80 ppbv.year<sup>-1</sup> (- 1.263%·year<sup>-1</sup>) for the 5<sup>th</sup> percentile in fall ~~was observed~~occurred in the  
lower stratosphere (17-19 km).

#### 330 3.4. Characterization of the air masses sounded by the TMF tropospheric ozone lidar

331 In an attempt to characterize the air parcels sounded by lidar above TMF based on their travel  
332 history, 8-day backward trajectories ending at TMF between 5 and 14 km altitude were  
333 computed using the HYSPLIT4 model (Draxler and Rolph, 2003),  
334 <http://www.arl.noaa.gov/ready/hysplit4.html>). The NCAR/NCEP Reanalysis Pressure level data  
335 were used as meteorological input (Kalnay and Kanamitsu, 1996) in HYSPLIT4. These data,  
336 available since 1948, provide 4-times-daily meteorological information at 17 pressure levels

337 between the 1000 and 10 hPa and 2.5x2.5 degrees horizontal resolution. Several studies (Harris  
338 et al., 2005; Stohl, 1998) provided a wide range of uncertainty estimates along the trajectories.  
339 The more recent study by Engström and Magnusson, (2009) indicate values of 354-400 km  
340 before 4 days and 600 km after.

[<What does this last sentence mean?>](#)

341 Our trajectory analysis comprises two steps. First, the 8-day backward trajectories computed by  
342 HYSPLIT and ending at different altitude levels were grouped using the HYSPLIT clustering  
343 tool (Draxler et al., 2009) in order to identify the most significant paths followed by the air  
344 masses arriving over the station. Based on the results of this preliminary analysis, five main  
345 regions were identified: the stratosphere, the Asian boundary layer (ABL), the free-troposphere  
346 above Asia (AFT), Central America, and the Pacific Ocean. Once these geographical areas were  
347 identified, we performed a classification of the air parcels according to the criteria described  
348 next.

349 An air parcel was classified as “stratospheric” if the 8-day backward trajectory intercepted  
350 the tropopause and resided at least 2 days above the local tropopause. The tropopause height  
351 information comes from the global tropopause height data derived once a day by the NOAA  
352 Physical Sciences Division (<http://www.esrl.noaa.gov/psd>) from the same NCAR/NCEP  
353 Reanalysis database used as input to HYSPLIT4. Computations are based on the World  
354 Meteorological Organization (WMO, 1957) definition, that is, the lowest height at which the  
355 temperature lapse rate becomes lower than  $2 \text{ K.km}^{-1}$ , provided that along 2 km above this height  
356 the average lapse is also lower than  $2 \text{ K.km}^{-1}$ . In addition, the NOAA computations do not allow  
357 tropopause heights at pressure levels larger than 450 hPa and smaller than 85 hPa.

358 Next, the air parcels that were not classified as “stratosphere” were then classified as “Asian  
359 boundary layer” (ABL) for trajectories comprising a minimum residence time of 2 days within  
360 the area labelled “ABL” in Figure7, and below an altitude of 3 km. Next, air parcels with  
361 trajectories comprising a minimum residence time of 2 days within the area labelled “AFT” in  
362 Figure7, and above 3 km altitude were classified as “Asian Free-troposphere” (AFT).

363 The air parcels not classified as “stratosphere”, “ABL”, or “AFT” were then classified as  
364 “Central America” if the corresponding trajectories’ residence time over the “Central America”  
365 region depicted in Figure7 was found to be at least 2 days. Finally, the remaining parcels were

366 classified as “Pacific Ocean” when the residence time above the corresponding region (see figure  
367 7) reached or exceeded 2 days.

368 The classification of the air parcels took place sequentially, which means that each  
369 category is exclusive of the others. The classification was made for each of the four seasons  
370 separately in order to account for the seasonal changes in synoptic circulation. Examples of the  
371 corresponding classified back-trajectories are shown in Figure 8. The number and frequency of  
372 occurrences of each air parcel category for all seasons is compiled in Table 3. A monthly  
373 distribution of these occurrences is shown in Figure 9. With the selection criteria we have set, a  
374 very low number of parcels classified “ABL” were found. Air parcels dominantly originate in the  
375 Pacific Ocean below 10 km, with almost equal influence throughout the year. Increasing  
376 influence of the stratosphere is observed at upper levels, with values ranging between 2 to 78%  
377 or higher during winter and spring. This result agrees well with previous studies in the Western  
378 US (Sprenger, 2003; Stohl, 2003). A statistically significant Central American influence was  
379 identified in summer with a frequency of the occurrence varying between 11% and 3%,  
380 decreasing with altitude. The Central America influence coincides with the establishment of the  
381 North American Monsoon circulation from July to September and which affects Central America  
382 and the Southwestern US.

383 Composite ozone profiles were estimated for each category of air parcel and for altitudes  
384 between 4.5 and 13.5 km at 1-km altitude intervals. Figure 10 shows the ozone mixing ratio  
385 mean (open circles), median (red bars), 25<sup>th</sup> and 75<sup>th</sup> percentiles (blue bars) at 9 km altitude for  
386 each of the identified categories and season. The number of occurrences for each category is  
387 mentioned between parentheses. The ozone statistics obtained when a low number of  
388 occurrences was found should be ignored (e.g., Central America in Spring, or ABL for most  
389 seasons). Figure 11 shows, for each season, the composite ozone profiles constructed from the  
390 ozone mixing ratio median values found for a particular category at a given altitude. In order to  
391 keep the most statistically significant results, composite values computed using less than 5% of  
392 the total number of samples for a given season were not plotted, leaving out certain sections of  
393 the composite profiles, and in the case of ABL, leaving out the entire profile.

394 Not surprisingly, the analysis reveals that larger ozone mixing ratio values were observed  
395 when the air masses were classified as “stratospheric” regardless of altitude and season (65-85



396 ppbv below 9 km). For this category, large ozone variability was found, as indicated by the 25<sup>th</sup>  
397 and 75<sup>th</sup> percentiles in Figure 10. As altitude increases, the influence of the stratosphere is more  
398 important, exceeding 30% above 12 km, resulting in higher ozone mixing ratio values (red  
399 curves in Figure 11).

400 Conversely, low ozone mixing ratio values (50-65 ppbv below 9 km) were consistently  
401 associated with the air parcels classified as “Pacific Ocean” (cyan curves). This region can be  
402 considered as a source of ‘background ozone’, since no anthropogenic source is expected to  
403 affect the local ozone budget. Slightly higher ozone content (50-70 ppbv higher) is  
404 systematically found for air parcels classified as “Asian free-troposphere” (AFT), but the number  
405 of occurrences remains too small to provide any meaningful interpretation. No conclusion can be  
406 made for air parcels classified as “Asian Boundary layer” (ABL) due to the very low number of  
407 occurrences found.

408 During summer, ozone values of about 70 ppbv were found at 9 km altitude for the 85 air  
409 parcels classified as “Central America” (yellow curve). The corresponding values for the 277 air  
410 parcels classified as “Pacific Ocean” are about 55 ppbv, which is 15 ppbv lower. This difference  
411 possibly points out to the lightning-induced enhancement of ozone within the more frequent  
412 occurrence of thunderstorms during the North American summer monsoon.

### 413 3.5. The influence of tropopause folds on the TMF tropospheric ozone record

414 In the previous section, a large variability in the composite ozone content was found for the air  
415 parcels classified as “stratospheric”. In the current section, we provide at least one clear  
416 explanation for this large variability. Tropopause folds are found primarily in the vicinity of the  
417 subtropical jets, in the 20°-50° latitude range. They typically consist of three-dimensional folds of  
418 the virtual surface separating air masses of tropospheric characteristics (weakly stratified, moist,  
419 low ozone concentration, etc.) and those of stratospheric characteristics (highly stratified, dry,  
420 high ozone concentration, etc.). Tropopause folds can result in the transport of large amounts of  
421 stratospheric ozone into the troposphere, reaching in some cases the planetary boundary layer  
422 and enhancing ozone amounts even at the surface (Chung and Dann, 1985; Langford et al., 2012;  
423 Lefohn et al., 2012; Lin et al., 2012a). They are considered one of the main mechanisms of  
424 stratosphere-to-troposphere exchange and have been widely studied in the past (e.g. Bonasoni

425 and Evangelisti, 2000; Danielsen and Mohnen, 1977; Lefohn et al., 2011; Vaughan et al., 1994;  
426 Yates et al., 2013). Due to the location of TMF, the upper troposphere above the site is  
427 frequently impacted by tropopause folds. The MERRA reanalysis (1-km vertical resolution, 1 x  
428 1.25 degrees horizontal resolution) were used in this study to identify the presence of double  
429 tropopauses above the station. A comparison between the MERRA temperature profiles and the  
430 temperature profiles measured by the radiosondes launched at TMF was performed in order to  
431 evaluate the performance of MERRA above TMF. The comparison (not shown) reveals excellent  
432 agreement, with average relative differences of 2% or less from the surface up to 25 km. The  
433 heights of double tropopauses were computed following a methodology similar to that proposed  
434 in Chen et al., (2011). The first (lower) tropopause is identified according to the WMO  
435 definition, as explained earlier. A second (upper) tropopause is identified above the WMO  
436 tropopause if the temperature lapse rate increases over 3 K/km within at least 1 km, and its  
437 height is determined once again by the WMO criterion.

438 Using this methodology, we found that 27% of the TMF tropospheric ozone lidar profiles  
439 were measured in the presence of double tropopauses. Figure 12 shows the number of cases with  
440 double tropopauses above TMF distributed per months, with the number of days with tropopause  
441 folds being normalized to the total number of measurements every month (compiled in Table 1).  
442 As we can see, the presence of double tropopauses was especially frequent during winter and  
443 spring, which coincides with the higher frequency of stratospheric air masses arriving at TMF  
444 estimated by the backward trajectories analysis (Figure 9). The altitude of detected single  
445 tropopauses is found around 13 km in winter and spring, and 16-17 km in summer and fall  
446 (Figure 13a-d). When a double tropopause is identified, the altitude of the lower tropopause  
447 ranges between 8 and 15 km, with the distribution peak centered around 12-13 km (Figure 13e-  
448 h), and the second tropopause is detected typically around 17-18 km (Figure 13i-l).

449 Figure 14 shows the average of all tropospheric ozone lidar profiles measured in winter  
450 (blue curves) and spring (red curves) in the presence of a double tropopause (solid curves), and  
451 in the presence of a single tropopause (dashed curves). The right panel (Figure 14b) is simply a  
452 lower tropospheric-zoomed version of the left panel (Figure 14a). Only winter and spring are  
453 shown because they are the seasons most affected by double tropopause cases as previously  
454 stated. In the presence of double tropopauses a clear dual vertical structure in ozone is observed,

455 with higher ozone values between 9 and 14 km and lower mixing ratio values between 14 and 18  
456 km. This dual structure is consistent with the expected origin of the air masses within a  
457 tropopause fold. Stratospheric air, richer in ozone, is measured within the lower half of the fold  
458 (12-14 km), while tropospheric ozone-poor air is measured within the upper half of the fold (14-  
459 18 km). In the case of deep stratospheric intrusions, ozone-rich stratospheric air masses  
460 embedded in the lower half of the fold can reach lower altitudes, and occasionally the planetary  
461 boundary layer mixing down to the surface (Chung and Dann, 1985; Langford et al., 2012, 2015;  
462 Lefohn et al., 2012; Lin et al., 2012a), leading to an ozone increase in the lower troposphere  
463 (Figure 14b). In our case, the mean increase is around 2 ppbv below 6 km for both spring and  
464 winter. Note the relative magnitude of the ozone anomalies in the lower and upper halves of the  
465 fold is different for spring and winter. A detailed investigation, beyond the scope of the present  
466 work, is needed to assess the actual significance of this difference.

#### 467 4. Summary and discussion

468 Long-term (2000-2015) tropospheric ozone measurements obtained from the differential  
469 absorption lidar located at the JPL Table Mountain Facility in Southern California (elev. 2285 m)  
470 were used for the first time to investigate ozone variability at time-scales ranging from days to  
471 decades. The routine nighttime lidar profiles (3.5-25 km) were complemented by 24-hour  
472 continuous surface ozone measurements acquired since 2013. The present study allowed the  
473 characterization of the full profile from the ground to the stratosphere, and is particularly  
474 valuable in the context of a notoriously sparse horizontal coverage for this type of vertically  
475 resolved measurements in a region affected by transboundary ozone inflow and stratospheric  
476 intrusions.

477 The observed diurnal and seasonal variability is consistent with that observed at other high-  
478 elevation rural sites, implying high values and low amplitudes of the seasonal and diurnal cycles  
479 compared to those observed at low elevation and/or urban sites (Brodin et al., 2010; Gallardo et  
480 al., 2000; Naja et al., 2003). The monthly mean surface ozone mixing ratio agrees well with that  
481 measured by lidar in the lower troposphere throughout the year (Figure 4), thus revealing that  
482 nighttime surface conditions are representative of nighttime lower tropospheric conditions.  
483 Additional daytime lidar measurements will be performed in 2016 to assess whether such  
484 consistency also exists at other times of the day, especially in the afternoon.

485 The analysis of the long-term lidar time-series (16 years covered) shows no significant  
486 signatures of interannual variability, though larger ozone values were generally observed in  
487 2003-2007 compared to the rest of the measurement period. More importantly, no obvious  
488 signature of ENSO or the QBO could be identified, which is inconsistent with the recent findings  
489 of Lin et al., (2015) or Neu et al., (2014), who have linked tropospheric ozone variability in the  
490 Northern Hemisphere to El Niño/ La Niña events, and the QBO, through the variations of  
491 stratospheric/tropospheric ozone fluxes. However, this inconsistency might not be so surprising  
492 if we take into account the obvious difference in measurement sampling (one single location in  
493 the Western U.S. as opposed to global observations). Nevertheless, our analysis reveals  
494 statistically-significant trends for selected seasons and altitudes. Specifically, a positive trend of  
495  $0.31 \text{ ppbv}\cdot\text{year}^{-1}$  (ozone annual median) was found in the upper troposphere (7-10 km). This  
496 positive trend is more pronounced in spring and summer ( $0.71$  and  $0.58 \text{ ppbv}\cdot\text{year}^{-1}$   
497 respectively), whereas a negative trend ( $-0.43 \text{ ppbv}\cdot\text{year}^{-1}$ ) was found in winter. A negative trend  
498 of  $-0.36 \text{ ppbv}\cdot\text{year}^{-1}$  was also detected in winter in the lower troposphere (4-7 km). [<These  
499 results should include trend uncertainties and should include only significant figures  
500 in the trend estimates. The wintertime negative results require an explanation.>](#) Our  
501 springtime positive trend estimates only broadly agree with those reported in the literature. The  
502 two-decade-long efforts to implement regulations to control air quality and anthropogenic  
503 emissions in the U.S. have led to a clear decrease in ozone levels in the Eastern U.S., but not in  
504 the Western U.S. (e.g. Copper et al., 2012; 2014). This different regional behavior has been  
505 attributed to the inflow of elevated ozone, mainly from East Asia, and to the increasing  
506 contribution of stratospheric intrusions (Cooper et al., 2010; Jacob et al., 1999; Parrish et al.,  
507 2009; Reidmiller et al., 2009). But again, differences in sampling can impact significantly the  
508 interpretation of our trend estimates. As pointed out by Lin et al. (2015b), further coordination  
509 efforts at both global and regional scales are necessary in order to reduce biases introduced by  
510 inhomogeneity in sampling. As part of these efforts, an extended analysis based on the origin of  
511 the air masses sampled by the TMF lidar is under way, with the ultimate objective to filter  
512 [out](#) synoptic noise ~~out~~, and better quantify the ENSO and QBO signals and the residual trends.  
As a prerequisite to such study, a preliminary characterization of the air masses sounded by the  
TMF lidar was performed and presented here.

513 Backward trajectories were computed in an attempt to classify the air masses sampled by the  
514 TMF lidar over the period 2000-2015. Our classification, based on a 2-day [<Perhaps too long a  
515 requirement?>](#) residence time within each region, comprised five categories, namely  
“stratosphere”, “Pacific Ocean”, “Asian

516 Boundary Layer”, “Asian free-troposphere”, and “Central America”. After computing more than  
517 20,000 8-day back-trajectories covering the troposphere every 1–km for each lidar measurement  
518 made between 2000 and 2015, the Pacific Ocean and the stratosphere categories were found  
519 most frequently. Not surprisingly, parcels identified as “stratosphere” contain the highest ozone  
520 mixing ratios, and parcels classified as “Pacific Ocean” contain the lowest ozone concentrations,  
521 which can be considered as ‘background conditions’. No outstanding signature from the Asian  
522 boundary layer could be identified due to the low number occurrences associated with this  
523 category. Nevertheless, air parcels classified as “Asian free-troposphere” seemed to contain  
524 systematically more ozone than those classified as “Pacific Ocean”, especially below 9 km. A  
525 refined classification, probably requiring the use of chemistry-transport models, is needed to  
526 assess whether the Asian boundary layer or the Asian free-troposphere have a detectable impact  
527 on the ozone content measured above TMF.

528 In summer, air masses coming from Central America were frequently detected. The ozone  
529 mixing ratio values measured in this case were clearly above the climatological mean, with  
530 values up to 15 ppbv larger than those associated with the Pacific Ocean region. Previous studies  
531 (Cooper et al., 2009), have observed enhanced ozone values associated with the North American  
532 Monsoon, mainly due to ozone production associated with lightning (Choi et al., 2009; Cooper et  
533 al., 2009). However, this feature was observed in the Eastern U.S. Because of the synoptic  
534 conditions during the monsoon, the Western U.S. is not as much influenced and no significant  
535 ozone increase was reported (Barth et al., 2012; Cooper et al., 2009). Nevertheless, Cooper et al.,  
536 (2009) reported higher modeled lightning-induced NO<sub>x</sub> concentrations at TMF than at other  
537 western locations, which would be consistent with our findings. Further investigation, including  
538 a detailed history of the meteorological conditions along the trajectories, is needed to confirm  
539 this correlation.

540 As part of the characterization of the TMF lidar-sampled air masses, the impact of double  
541 tropopauses was assessed. The presence of a double tropopause was identified using the MERRA  
542 temperature profiles interpolated at the location of TMF. Between 2000 and 2015, the frequency  
543 of occurrence of double tropopauses above TMF was found to be around 27%. This high  
544 frequency, especially observed in winter and spring, was expected considering the latitude of  
545 TMF, i.e., near the subtropical jet, where frequent tropopause folds occur. More interestingly, a

546 clear, dual vertical structure in ozone was observed in the presence of a double tropopause  
547 (Figure 14). The first (lower) tropopause, which typically coincides with the WMO tropopause  
548 reported by meteorological services, was systematically identified around 12-14 km. The second  
549 (upper) tropopause was mostly identified around 15-18 km. The double tropopause is expected to  
550 result from a tropopause fold in the layer between the two identified tropopauses. The dual ozone  
551 structure observed by lidar coincides with the expected location of the fold, and consists of  
552 systematically higher-than-average mixing ratios in the lower half of the fold (12-14 km), and  
553 lower-than-average mixing ratios in the upper half of the fold (14-18 km). In addition,  
554 statistically significant higher-than-average mixing ratios (+2 ppbv) are observed in the lower  
555 troposphere (4-10 km) in the presence of double-tropopauses. This increase is consistent with  
556 previous reports of the importance of the stratosphere as an ozone source in the lower  
557 troposphere (Cooper and Stohl, 2005; Langford et al., 2012; Lefohn et al., 2011; Trickl et al.,  
558 2011), with a 25 to 50% contribution to the tropospheric budget (Davies and Schuepbach, 1994;  
559 Ladstätter-Weißemayer et al., 2004; Roelofs and Lelieveld, 1997; Stevenson et al., 2006).

560 Further investigation is now underway, with the objective of better identifying all  
561 signatures of interannual variability and trends. This long-term variability investigation not only  
562 will include an air mass classification based on geographical area, but will also take into account  
563 the history of the air parcels in the context of nearby tropopause folds. Altogether, this air parcel  
564 characterization, used in conjunction with regional chemistry-climate or chemistry-transport  
565 model runs, should unveil signatures hidden in the current lidar record, and eventually shed new  
566 light on the origin of the reported past, current, and future tropospheric ozone trends over the  
567 Western U.S.

#### 568 ACKNOWLEDGEMENTS

569 The work described in this paper was carried out at the Jet Propulsion Laboratory,  
570 California Institute of Technology, under a Caltech Postdoctoral Fellowship sponsored by the  
571 NASA Tropospheric Chemistry Program. Support for the lidar, surface, and ozonesonde  
572 measurements was provided by the NASA Upper Atmosphere Research Program. The authors  
573 would like to thank M. Brewer, T. Grigsby, J. Howe, and members of the JPL Lidar Team who  
574 assisted in the collection of the data used here. The authors gratefully acknowledge the NOAA  
575 Air Resources Laboratory (ARL) for the provision of the HYSPLIT transport and dispersion

576 model and/or READY website (<http://www.ready.noaa.gov>) and the NCEP/NCAR Reanalysis  
577 team for the data used in this publication. We would also like to thank Dr. Susan Strahan and the  
578 MERRA Reanalysis team for providing the data used in this study and to acknowledge the  
579 California Air Resources Board for providing the surface ozone data.

580 Copyright 2016. All rights reserved.

## 581 REFERENCES

- 582 Ambrose, J., Reidmiller, D. and Jaffe, D.: Causes of high O<sub>3</sub> in the lower free troposphere over the  
583 Pacific Northwest as observed at the Mt. Bachelor Observatory, *Atmos. Environ.*, 2011.
- 584 Barth, M. C., Lee, J., Hodzic, A., Pfister, G., Skamarock, W. C., Worden, J., Wong, J. and Noone, D.:  
585 Thunderstorms and upper troposphere chemistry during the early stages of the 2006 North American  
586 Monsoon, *Atmos. Chem. Phys.*, 12(22), 11003–11026, doi:10.5194/acp-12-11003-2012, 2012.
- 587 Bonasoni, P. and Evangelisti, F.: Stratospheric ozone intrusion episodes recorded at Mt. Cimone during  
588 the VOTALP project: case studies, *Atmos. ....*, 2000.
- 589 Brodin, M., Helmig, D. and Oltmans, S.: Seasonal ozone behavior along an elevation gradient in the  
590 Colorado Front Range Mountains, *Atmos. Environ.*, 44(39), 5305–5315,  
591 doi:10.1016/j.atmosenv.2010.06.033, 2010.
- 592 Brown-Steiner, B. and Hess, P.: Asian influence on surface ozone in the United States: A comparison of  
593 chemistry, seasonality, and transport mechanisms, *J. Geophys. Res. Atmos.*, 116(17), 1–13,  
594 doi:10.1029/2011JD015846, 2011.
- 595 Bufton, J. L., Stewart, R. W. and Weng, C.: Remote measurement of tropospheric ozone., *Appl. Opt.*,  
596 18(20), 3363–4, doi:10.1364/AO.18.003363, 1979.
- 597 Choi, Y., Kim, J., Eldering, A., Osterman, G., Yung, Y. L., Gu, Y. and Liou, K. N.: Lightning and  
598 anthropogenic NO<sub>x</sub> sources over the United States and the western North Atlantic Ocean: Impact on  
599 OLR and radiative effects, *Geophys. Res. Lett.*, 36(17), L17806, doi:10.1029/2009GL039381, 2009.
- 600 Chung, Y. and Dann, T.: Observations of stratospheric ozone at the ground level in Regina, Canada,  
601 *Atmos. Environ.*, 1985.
- 602 Cooper, O. and Stohl, A.: A springtime comparison of tropospheric ozone and transport pathways on the  
603 east and west coasts of the United States, *J. ....*, 2005.
- 604 Cooper, O. R., Forster, C., Parrish, D., Trainer, M., Dunlea, E., Ryerson, T., Hübler, G., Fehsenfeld, F.,  
605 Nicks, D., Holloway, J., de Gouw, J., Warneke, C., Roberts, J. M., Flocke, F. and Moody, J.: A case study of  
606 transpacific warm conveyor belt transport: Influence of merging airstreams on trace gas import to North  
607 America, *J. Geophys. Res. Atmos.*, 109(D23), n/a–n/a, doi:10.1029/2003JD003624, 2004.
- 608 Cooper, O. R., Eckhardt, S., Crawford, J. H., Brown, C. C., Cohen, R. C., Bertram, T. H., Wooldridge, P.,  
609 Perrig, A., Brune, W. H., Ren, X., Brunner, D. and Baughcum, S. L.: Summertime buildup and decay of  
610 lightning NO<sub>x</sub> and aged thunderstorm outflow above North America, *J. Geophys. Res.*, 114(D1), D01101,  
611 doi:10.1029/2008JD010293, 2009.
- 612 Cooper, O. R., Parrish, D. D., Stohl, A., Trainer, M., Nédélec, P., Thouret, V., Cammas, J. P., Oltmans, S. J.,

613 Johnson, B. J., Tarasick, D., Leblanc, T., McDermid, I. S., Jaffe, D., Gao, R., Stith, J., Ryerson, T., Aikin, K.,  
614 Campos, T., Weinheimer, A. and Avery, M. A.: Increasing springtime ozone mixing ratios in the free  
615 troposphere over western North America, *Nature*, 463(7279), 344–348, doi:10.1038/nature08708, 2010.

616 Cooper, O. R., Gao, R.-S., Tarasick, D., Leblanc, T. and Sweeney, C.: Long-term ozone trends at rural  
617 ozone monitoring sites across the United States, 1990–2010, *J. Geophys. Res. Atmos.*, 117(D22), n/a–n/a,  
618 doi:10.1029/2012JD018261, 2012.

619 Cooper, O. R., Parrish, D. D., Ziemke, J., Balashov, N. V., Cupeiro, M., Galbally, I. E., Gilge, S., Horowitz, L.,  
620 Jensen, N. R., Lamarque, J.-F., Naik, V., Oltmans, S. J., Schwab, J., Shindell, D. T., Thompson, A. M.,  
621 Thouret, V., Wang, Y. and Zbinden, R. M.: Global distribution and trends of tropospheric ozone: An  
622 observation-based review, *Elem. Sci. Anthr.*, 2, 000029, doi:10.12952/journal.elementa.000029, 2014.

623 Cui, J., Sprenger, M., Staehelin, J., Siegrist, A., Kunz, M., Henne, S. and Steinbacher, M.: Impact of  
624 stratospheric intrusions and intercontinental transport on ozone at Jungfraujoch in 2005: comparison  
625 and validation of two Lagrangian approaches, *Atmos. Chem. Phys.*, 9(10), 3371–3383, doi:10.5194/acp-  
626 9-3371-2009, 2009.

627 Danielsen, E. F. and Mohnen, V. A.: Project dustorm report: ozone transport, in situ measurements, and  
628 meteorological analyses of tropopause folding, *J. Geophys. Res.*, 82(37), 5867–5877,  
629 doi:10.1029/JC082i037p05867, 1977.

630 Davies, T. D. and Schuepbach, E.: Episodes of high ozone concentrations at the earth's surface resulting  
631 from transport down from the upper troposphere/lower stratosphere: a review and case studies,  
632 *Atmos. Environ.*, 28(1), 53–68, doi:10.1016/1352-2310(94)90022-1, 1994.

633 Derwent, R. G., Simmonds, P. G., Manning, A. J. and Spain, T. G.: Trends over a 20-year period from 1987  
634 to 2007 in surface ozone at the atmospheric research station, Mace Head, Ireland, *Atmos. Environ.*,  
635 41(39), 9091–9098, doi:10.1016/j.atmosenv.2007.08.008, 2007.

636 Draxler, R., Stunder, B., Rolph, G. and Taylor, A.: Hysplit 4 User's Guide, NOAA Air Resources Laboratory,  
637 Silver Spring, 2009.

638 Dufour, G., Eremenko, M., Orphal, J. and Flaud, J.-M.: IASI observations of seasonal and day-to-day  
639 variations of tropospheric ozone over three highly populated areas of China: Beijing, Shanghai, and Hong  
640 Kong, *Atmos. Chem. Phys.*, 10(8), 3787–3801, doi:10.5194/acp-10-3787-2010, 2010.

641 Feister, U. and Warmbt, W.: Long-term measurements of surface ozone in the German Democratic  
642 Republic, *J. Atmos. Chem.*, 5(1), 1–21, doi:10.1007/BF00192500, 1987.

643 Forster, P., Ramaswamy, V., Artaxo, P., Bernsten, T., Betts, R., Fahey, D. W., Haywood, J., Lean, J., Lowe,  
644 D. W., Myhre, G., Nganga, J., Prinn, R., Raga, G., Schulz, M. and Van Dorland, R.: Changes in atmospheric  
645 constituents and in radiative forcing. Chapter 2, Cambridge University Press, Cambridge, United  
646 Kingdom and New York, NY, USA., 2007.

647 Gallardo, L., Carrasco, J. and Olivares, G.: An analysis of ozone measurements at Cerro Tololo (30  
648 degrees S, 70 degrees W, 2200 m.a.s.l.) in Chile, *Tellus Ser. B-Chemical Phys. Meteorol.*, 52(1), 50–59,  
649 doi:10.1034/j.1600-0889.2000.00959.x, 2000.

650 Gao, J., Wang, T., Ding, A. and Liu, C.: Observational study of ozone and carbon monoxide at the summit  
651 of mount Tai (1534m a.s.l.) in central-eastern China, *Atmos. Environ.*, 39(26), 4779–4791,  
652 doi:10.1016/j.atmosenv.2005.04.030, 2005.

653 Granier, C., Bessagnet, B., Bond, T., D'Angiola, A., Denier van der Gon, H., Frost, G. J., Heil, A., Kaiser, J.



654 W., Kinne, S., Klimont, Z., Kloster, S., Lamarque, J.-F., Liousse, C., Masui, T., Meleux, F., Mieville, A.,  
655 Ohara, T., Raut, J.-C., Riahi, K., Schultz, M. G., Smith, S. J., Thompson, A., van Aardenne, J., van der Werf,  
656 G. R. and van Vuuren, D. P.: Evolution of anthropogenic and biomass burning emissions of air pollutants  
657 at global and regional scales during the 1980–2010 period, *Clim. Change*, 109(1-2), 163–190,  
658 doi:10.1007/s10584-011-0154-1, 2011.

659 Jacob, D. J., Logan, J. A. and Murti, P. P.: Effect of rising Asian emissions on surface ozone in the United  
660 States, *Geophys. Res. Lett.*, 26(14), 2175–2178, doi:10.1029/1999GL900450, 1999.

661 Jaffe, D., Bertschi, I., Jaeglé, L., Novelli, P., Reid, J. S., Tanimoto, H., Vingarzan, R. and Westphal, D. L.:  
662 Long-range transport of Siberian biomass burning emissions and impact on surface ozone in western  
663 North America, *Geophys. Res. Lett.*, 31(16), L16106, doi:10.1029/2004GL020093, 2004.

664 Ladstätter-Weißenmayer, A., Meyer-Arnek, J., Schlemm, A. and Burrows, J. P.: Influence of stratospheric  
665 air masses on tropospheric vertical O<sub>3</sub> columns based on GOME (Global Ozone Monitoring Experiment)  
666 measurements and backtrajectory calculation over the Pacific, *Atmos. Chem. Phys.*, 4(4), 903–909,  
667 doi:10.5194/acp-4-903-2004, 2004.

668 Langford, A. O., Brioude, J., Cooper, O. R., Senff, C. J., Alvarez, R. J., Hardesty, R. M., Johnson, B. J. and  
669 Oltmans, S. J.: Stratospheric influence on surface ozone in the Los Angeles area during late spring and  
670 early summer of 2010, *J. Geophys. Res. Atmos.*, 117(D21), n/a–n/a, doi:10.1029/2011JD016766, 2012.

671 Langford, A. O., Pierce, R. B. and Schultz, P. J.: Stratospheric intrusions, the Santa Ana winds, and  
672 wildland fires in Southern California, *Geophys. Res. Lett.*, n/a–n/a, doi:10.1002/2015GL064964, 2015.

673 Law, K. S., Plantevin, P.-H., Thouret, V., Marenco, A., Asman, W. A. H., Lawrence, M., Crutzen, P. J.,  
674 Muller, J.-F., Hauglustaine, D. A. and Kanakidou, M.: Comparison between global chemistry transport  
675 model results and Measurement of Ozone and Water Vapor by Airbus In-Service Aircraft (MOZAIC) data,  
676 *J. Geophys. Res.*, 105(D1), 1503, doi:10.1029/1999JD900474, 2000.

677 Leblanc, T., McDermaid, I. S. and Walsh, T. D.: Ground-based water vapor raman lidar measurements up  
678 to the upper troposphere and lower stratosphere for long-term monitoring, *Atmos. Meas. Tech.*, 5(1),  
679 17–36, doi:10.5194/amt-5-17-2012, 2012.

680 Lee, S. and Akimoto, H.: Lower tropospheric ozone trend observed in 1989–1997 at Okinawa, Japan,  
681 *Geophys. ...*, 25(10), 1998, 1998.

682 Lefohn, A. S., Wernli, H., Shadwick, D., Limbach, S., Oltmans, S. J. and Shapiro, M.: The importance of  
683 stratospheric–tropospheric transport in affecting surface ozone concentrations in the western and  
684 northern tier of the United States, *Atmos. Environ.*, 45(28), 4845–4857,  
685 doi:10.1016/j.atmosenv.2011.06.014, 2011.

686 Lefohn, A. S., Wernli, H., Shadwick, D., Oltmans, S. J. and Shapiro, M.: Quantifying the importance of  
687 stratospheric–tropospheric transport on surface ozone concentrations at high- and low-elevation  
688 monitoring sites in the United States, *Atmos. Environ.*, 62, 646–656,  
689 doi:10.1016/j.atmosenv.2012.09.004, 2012.

690 Lelieveld, J., van Aardenne, J., Fischer, H., de Reus, M., Williams, J. and Winkler, P.: Increasing ozone  
691 over the Atlantic Ocean., *Science*, 304(5676), 1483–7, doi:10.1126/science.1096777, 2004.

692 Levy, H., Mahlman, J. D., Moxim, W. J. and Liu, S. C.: Tropospheric ozone: The role of transport, *J.*  
693 *Geophys. Res.*, 90(D2), 3753, doi:10.1029/JD090iD02p03753, 1985.

694 Liang, Q., Jaeglé, L., Jaffe, D. A., Weiss-Penzias, P., Heckman, A. and Snow, J. A.: Long-range transport of

695 Asian pollution to the northeast Pacific: Seasonal variations and transport pathways of carbon  
696 monoxide, *J. Geophys. Res. Atmos.*, 109(D23), n/a–n/a, doi:10.1029/2003JD004402, 2004.

697 Lin, M., Fiore, A. M., Cooper, O. R., Horowitz, L. W., Langford, A. O., Levy, H., Johnson, B. J., Naik, V.,  
698 Oltmans, S. J. and Senff, C. J.: Springtime high surface ozone events over the western United States:  
699 Quantifying the role of stratospheric intrusions, *J. Geophys. Res. Atmos.*, 117(D21), n/a–n/a,  
700 doi:10.1029/2012JD018151, 2012a.

701 Lin, M., Fiore, A. M., Horowitz, L. W., Cooper, O. R., Naik, V., Holloway, J., Johnson, B. J., Middlebrook, A.  
702 M., Oltmans, S. J., Pollack, I. B., Ryerson, T. B., Warner, J. X., Wiedinmyer, C., Wilson, J. and Wyman, B.:  
703 Transport of Asian ozone pollution into surface air over the western United States in spring, *J. Geophys.*  
704 *Res. Atmos.*, 117(4), 1–20, doi:10.1029/2011JD016961, 2012b.

705 Lin, M., Fiore, A. M., Horowitz, L. W., Langford, A. O., Oltmans, S. J., Tarasick, D. and Rieder, H. E.:  
706 Climate variability modulates western US ozone air quality in spring via deep stratospheric intrusions.,  
707 *Nat. Commun.*, 6, 7105, doi:10.1038/ncomms8105, 2015.

708 Logan, J. A.: Trends in the vertical distribution of ozone: An analysis of ozonesonde data, *J. Geophys.*  
709 *Res.*, 99(D12), 25553, doi:10.1029/94JD02333, 1994.

710 Logan, J. A., Megretskaja, I. A., Miller, A. J., Tiao, G. C., Choi, D., Zhang, L., Stolarski, R. S., Labow, G. J.,  
711 Hollandsworth, S. M., Bodeker, G. E., Claude, H., De Muer, D., Kerr, J. B., Tarasick, D. W., Oltmans, S. J.,  
712 Johnson, B., Schmidlin, F., Staehelin, J., Viatte, P. and Uchino, O.: Trends in the vertical distribution of  
713 ozone: A comparison of two analyses of ozonesonde data, *J. Geophys. Res.*, 104(D21), 26373,  
714 doi:10.1029/1999JD900300, 1999.

715 McDerimid, I. S.: Differential absorption lidar systems for tropospheric and stratospheric ozone  
716 measurements, *Opt. Eng.*, 30(1), 22, doi:10.1117/12.55768, 1991.

717 McDerimid, S., Beyerle, G., Haner, D. a and Leblanc, T.: Redesign and improved performance of the  
718 tropospheric ozone lidar at the Jet Propulsion Laboratory Table Mountain Facility., *Appl. Opt.*, 41(36),  
719 7550–7555, 2002.

720 Mickley, L. J., Jacob, D. J. and Rind, D.: Uncertainty in preindustrial abundance of tropospheric ozone:  
721 Implications for radiative forcing calculations, *J. Geophys. Res.*, 106(D4), 3389,  
722 doi:10.1029/2000JD900594, 2001.

723 Monks, P.: Gas-phase radical chemistry in the troposphere, *Chem. Soc. Rev.*, 2005.

724 Naja, M. and Akimoto, H.: Contribution of regional pollution and long-range transport to the Asia-Pacific  
725 region: Analysis of long-term ozonesonde data over Japan, *J. Geophys. Res.*, 109(D21), D21306,  
726 doi:10.1029/2004JD004687, 2004.

727 Naja, M., Lal, S. and Chand, D.: Diurnal and seasonal variabilities in surface ozone at a high altitude site  
728 Mt Abu (24.6??N, 72.7??E, 1680 m asl) in India, *Atmos. Environ.*, 37(30), 4205–4215, doi:10.1016/S1352-  
729 2310(03)00565-X, 2003.

730 Neu, J. L., Flury, T., Manney, G. L., Santee, M. L., Livesey, N. J. and Worden, J.: Tropospheric ozone  
731 variations governed by changes in stratospheric circulation, *Nat. Geosci.*, 7(5), 340–344,  
732 doi:10.1038/ngeo2138, 2014.

733 Oltmans, S. J. and Komhyr, W. D.: Surface ozone distributions and variations from 1973–1984:  
734 Measurements at the NOAA Geophysical Monitoring for Climatic Change Baseline Observatories, *J.*  
735 *Geophys. Res.*, 91(D4), 5229, doi:10.1029/JD091iD04p05229, 1986.

736 Oltmans, S. J., Lefohn, A. S., Scheel, H. E., Harris, J. M., Levy, H., Galbally, I. E., Brunke, E.-G., Meyer, C. P.,  
737 Lathrop, J. A., Johnson, B. J., Shadwick, D. S., Cuevas, E., Schmidlin, F. J., Tarasick, D. W., Claude, H., Kerr,  
738 J. B., Uchino, O. and Mohnen, V.: Trends of ozone in the troposphere, *Geophys. Res. Lett.*, 25(2), 139–  
739 142, doi:10.1029/97GL03505, 1998.

740 Oltmans, S. J., Lefohn, A. S., Harris, J. M., Galbally, I., Scheel, H. E., Bodeker, G., Brunke, E., Claude, H.,  
741 Tarasick, D., Johnson, B. J., Simmonds, P., Shadwick, D., Anlauf, K., Hayden, K., Schmidlin, F., Fujimoto, T.,  
742 Akagi, K., Meyer, C., Nichol, S., Davies, J., Redondas, A. and Cuevas, E.: Long-term changes in  
743 tropospheric ozone, *Atmos. Environ.*, 40(17), 3156–3173, doi:10.1016/j.atmosenv.2006.01.029, 2006.

744 Oltmans, S. J., Lefohn, a. S., Shadwick, D., Harris, J. M., Scheel, H. E., Galbally, I., Tarasick, D. W.,  
745 Johnson, B. J., Brunke, E. G., Claude, H., Zeng, G., Nichol, S., Schmidlin, F., Davies, J., Cuevas, E.,  
746 Redondas, a., Naoe, H., Nakano, T. and Kawasato, T.: Recent tropospheric ozone changes - A pattern  
747 dominated by slow or no growth, *Atmos. Environ.*, 67, 331–351, doi:10.1016/j.atmosenv.2012.10.057,  
748 2013.

749 Parrish, D. D., Millet, D. B., Goldstein, A. H. and Division, C. S.: Increasing ozone in marine boundary layer  
750 in ow at the west coasts of North America and Europe, *Atmos. Chem. Phys.*, 1303–1323,  
751 doi:10.5194/acp-9-1303-2009, 2009.

752 Parrish, D. D., Law, K. S., Staehelin, J., Derwent, R., Cooper, O. R., Tanimoto, H., Volz-Thomas, A., Gilge,  
753 S., Scheel, H.-E., Steinbacher, M. and Chan, E.: Long-term changes in lower tropospheric baseline ozone  
754 concentrations at northern mid-latitudes, *Atmos. Chem. Phys.*, 12(23), 11485–11504, doi:10.5194/acp-  
755 12-11485-2012, 2012.

756 Petetin, H., Thouret, V., Fontaine, A., Sauvage, B., Athier, G., Blot, R., Boulanger, D., Cousin, J.-M. and  
757 Nedelec, P.: Characterizing tropospheric ozone and CO around Frankfurt between 1994–2012 based on  
758 MOZIC-IGOS aircraft measurements, *Atmos. Chem. Phys. Discuss.*, 15(17), 23841–23891,  
759 doi:10.5194/acpd-15-23841-2015, 2015.

760 Pochanart, P., Hirokawa, J. and Kajii, Y.: Influence of regional-scale anthropogenic activity in northeast  
761 Asia on seasonal variations of surface ozone and carbon monoxide observed at Oki, Japan, *J. Geophys.*  
762 ..., 1999.

763 Reidmiller, D. R., Fiore, A. M., Jaffe, D. A., Bergmann, D., Cuvelier, C., Dentener, F. J., Duncan, B. N.,  
764 Folberth, G., Gauss, M., Gong, S., Hess, P., Jonson, J. E., Keating, T., Lupu, A., Marmer, E., Park, R.,  
765 Schultz, M. G., Shindell, D. T., Szopa, S., Vivanco, M. G., Wild, O. and Zuber, A.: The influence of foreign  
766 vs. North American emissions on surface ozone in the US, *Atmos. Chem. Phys.*, 9(14), 5027–5042,  
767 doi:10.5194/acp-9-5027-2009, 2009.

768 Roelofs, G.-J. and Lelieveld, J.: Model study of the influence of cross-tropopause O<sub>3</sub> transports on  
769 tropospheric O<sub>3</sub> levels, *Tellus B*, 49(1), 38–55, doi:10.1034/j.1600-0889.49.issue1.3.x, 1997.

770 Simmonds, P. G., Derwent, R. G., Manning, A. L. and Spain, G.: Significant growth in surface ozone at  
771 Mace Head, Ireland, 1987–2003, *Atmos. Environ.*, 38(28), 4769–4778,  
772 doi:10.1016/j.atmosenv.2004.04.036, 2004.

773 Smit, H. G. J., Straeter, W., Johnson, B. J., Oltmans, S. J., Davies, J., Tarasick, D. W., Hoegger, B., Stubi, R.,  
774 Schmidlin, F. J., Northam, T., Thompson, A. M., Witte, J. C., Boyd, I. and Posny, F.: Assessment of the  
775 performance of ECC-ozonesondes under quasi-flight conditions in the environmental simulation  
776 chamber: Insights from the Juelich Ozone Sonde Intercomparison Experiment (JOSIE), *J. Geophys. Res.*,  
777 112(D19), D19306, doi:10.1029/2006JD007308, 2007.

778 Sprenger, M.: A northern hemispheric climatology of cross-tropopause exchange for the ERA15 time  
779 period (1979–1993), *J. Geophys. Res.*, 108(D12), 8521, doi:10.1029/2002JD002636, 2003.

780 Staehelin, J., Thudium, J., Buehler, R., Volz-Thomas, A. and Graber, W.: Trends in surface ozone  
781 concentrations at Arosa (Switzerland), *Atmos. Environ.*, 28(1), 75–87, doi:10.1016/1352-2310(94)90024-  
782 8, 1994.

783 Stevenson, D. S., Dentener, F. J., Schultz, M. G., Ellingsen, K., van Noije, T. P. C., Wild, O., Zeng, G.,  
784 Amann, M., Atherton, C. S., Bell, N., Bergmann, D. J., Bey, I., Butler, T., Cofala, J., Collins, W. J., Derwent,  
785 R. G., Doherty, R. M., Drevet, J., Eskes, H. J., Fiore, A. M., Gauss, M., Hauglustaine, D. A., Horowitz, L. W.,  
786 Isaksen, I. S. A., Krol, M. C., Lamarque, J.-F., Lawrence, M. G., Montanaro, V., Müller, J.-F., Pitari, G.,  
787 Prather, M. J., Pyle, J. A., Rast, S., Rodriguez, J. M., Sanderson, M. G., Savage, N. H., Shindell, D. T.,  
788 Strahan, S. E., Sudo, K. and Szopa, S.: Multimodel ensemble simulations of present-day and near-future  
789 tropospheric ozone, *J. Geophys. Res.*, 111(D8), D08301, doi:10.1029/2005JD006338, 2006.

790 Stohl, A.: On the pathways and timescales of intercontinental air pollution transport, *J. Geophys. Res.*,  
791 107(D23), 4684, doi:10.1029/2001JD001396, 2002.

792 Stohl, A.: Stratosphere-troposphere exchange: A review, and what we have learned from STACCATO, *J.*  
793 *Geophys. Res.*, 108(D12), 8516, doi:10.1029/2002JD002490, 2003.

794 Strode, S. A., Rodriguez, J. M., Logan, J. A., Cooper, O. R., Witte, J. C., Lamsal, L. N., Damon, M., Van  
795 Aartsen, B., Steenrod, S. D. and Strahan, S. E.: Trends and variability in surface ozone over the United  
796 States, *J. Geophys. Res. Atmos.*, 120(17), n/a–n/a, doi:10.1002/2014JD022784, 2015.

797 Tanimoto, H., Ohara, T. and Uno, I.: Asian anthropogenic emissions and decadal trends in springtime  
798 tropospheric ozone over Japan: 1998–2007, *Geophys. Res. Lett.*, 36(23), L23802,  
799 doi:10.1029/2009GL041382, 2009.

800 The Royal Society, T.: Ground-level ozone in the 21st century: future trends, impacts and policy  
801 implications., 2008.

802 Thompson, A. M., Stone, J. B., Witte, J. C., Miller, S. K., Oltmans, S. J., Kucsera, T. L., Ross, K. L., Pickering,  
803 K. E., Merrill, J. T., Forbes, G., Tarasick, D. W., Joseph, E., Schmidlin, F. J., McMillan, W. W., Warner, J.,  
804 Hints, E. J. and Johnson, J. E.: Intercontinental Chemical Transport Experiment Ozone Network  
805 Study (IONS) 2004: 2. Tropospheric ozone budgets and variability over northeastern North America, *J.*  
806 *Geophys. Res.*, 112(D12), D12S13, doi:10.1029/2006JD007670, 2007.

807 Tie, X., Geng, F., Peng, L., Gao, W. and Zhao, C.: Measurement and modeling of O<sub>3</sub> variability in  
808 Shanghai, China: Application of the WRF-Chem model, *Atmos. Environ.*, 43(28), 4289–4302,  
809 doi:10.1016/j.atmosenv.2009.06.008, 2009.

810 Trickl, T., Feldmann, H., Kanter, H.-J., Scheel, H.-E., Sprenger, M., Stohl, A. and Wernli, H.: Forecasted  
811 deep stratospheric intrusions over Central Europe: case studies and climatologies, *Atmos. Chem. Phys.*,  
812 10(2), 499–524, doi:10.5194/acp-10-499-2010, 2010.

813 Trickl, T., Bärtsch-Ritter, N., Eisele, H., Furger, M., Mücke, R., Sprenger, M. and Stohl, A.: High-ozone  
814 layers in the middle and upper troposphere above Central Europe: potential import from the  
815 stratosphere along the subtropical jet stream, *Atmos. Chem. Phys.*, 11(17), 9343–9366, doi:10.5194/acp-  
816 11-9343-2011, 2011.

817 Tsutsumi, Y. and Matsueda, H.: Relationship of ozone and CO at the summit of Mt. Fuji (35.35°N,  
818 138.73°E, 3776m above sea level) in summer 1997, *Atmos. Environ.*, 34(4), 553–561, doi:10.1016/S1352-  
819 2310(99)00238-1, 2000.

820 Vaughan, G., Price, J. D. and Howells, A.: Transport into the troposphere in a tropopause fold, *Q. J. R.*  
821 *Meteorol. Soc.*, 120(518), 1085–1103, doi:10.1002/qj.49712051814, 1994.

822 Volz, A. and Kley, D.: Evaluation of the Montsouris series of ozone measurements made in the  
823 nineteenth century, *Nature*, 332(6161), 240–242, doi:10.1038/332240a0, 1988.

824 Wang, T., Ding, A., Gao, J. and Wu, W. S.: Strong ozone production in urban plumes from Beijing, China,  
825 *Geophys. Res. Lett.*, 33(21), L21806, doi:10.1029/2006GL027689, 2006.

826 WMO, M.: A three-dimensional science: Second session of the commission for aerology, *WMO Bull.*, IV,  
827 1957.

828 World Health Organization: Health aspects of air pollution with particulate matter, ozone and nitrogen  
829 dioxide: report on a WHO working group, Bonn, Germany 13-15 January 2003., 2003.

830 Yates, E. L., Iraci, L. T., Roby, M. C., Pierce, R. B., Johnson, M. S., Reddy, P. J., Tadić, J. M., Loewenstein,  
831 M. and Gore, W.: Airborne observations and modeling of springtime stratosphere-to- troposphere  
832 transport over California, *Atmos. Chem. Phys.*, 13(24), 12481–12494, doi:10.5194/acp-13-12481-2013,  
833 2013.

834 Young, P. J., Archibald, A. T., Bowman, K. W., Lamarque, J.-F., Naik, V., Stevenson, D. S., Tilmes, S.,  
835 Voulgarakis, A., Wild, O., Bergmann, D., Cameron-Smith, P., Cionni, I., Collins, W. J., Dalsøren, S. B.,  
836 Doherty, R. M., Eyring, V., Faluvegi, G., Horowitz, L. W., Josse, B., Lee, Y. H., MacKenzie, I. A., Nagashima,  
837 T., Plummer, D. A., Righi, M., Rumbold, S. T., Skeie, R. B., Shindell, D. T., Strode, S. A., Sudo, K., Szopa, S.  
838 and Zeng, G.: Pre-industrial to end 21st century projections of tropospheric ozone from the Atmospheric  
839 Chemistry and Climate Model Intercomparison Project (ACCMIP), *Atmos. Chem. Phys.*, 13(4), 2063–  
840 2090, doi:10.5194/acp-13-2063-2013, 2013.

841 Zbinden, R. M., Cammas, J.-P., Thouret, V., Nédélec, P., Karcher, F. and Simon, P.: Mid-latitude  
842 tropospheric ozone columns from the MOZIC program: climatology and interannual variability, *Atmos.*  
843 *Chem. Phys.*, 6(4), 1053–1073, doi:10.5194/acp-6-1053-2006, 2006.

844 Zhang, L., Jacob, D. J., Liu, X., Logan, J. A., Chance, K., Eldering, A. and Bojkov, B. R.: Intercomparison  
845 methods for satellite measurements of atmospheric composition: application to tropospheric ozone  
846 from TES and OMI, *Atmos. Chem. Phys.*, 10(10), 4725–4739, doi:10.5194/acp-10-4725-2010, 2010.

847

848

849

850

851 **Tables:**

852

853 Table 1. Number of measurements, by month and years, performed at TMF with the tropospheric  
854 ozone DIAL system distributed

855

|       | Jan | Feb | Mar | Apr | May | Jun | Jul | Aug | Sep | Oct | Nov | Dec | Total |
|-------|-----|-----|-----|-----|-----|-----|-----|-----|-----|-----|-----|-----|-------|
| 2000  | 4   | 2   | 6   | 4   | 11  | 12  | 7   | 10  | 8   | 1   | 4   | 2   | 65    |
| 2001  | 1   | 11  | 17  | 2   | 9   | 13  | 12  | 15  | 15  | 17  | 1   | 11  | 130   |
| 2002  | 6   | 10  | 6   | 4   | 0   | 10  | 11  | 1   | 6   | 16  | 6   | 10  | 93    |
| 2003  | 11  | 9   | 15  | 12  | 10  | 13  | 5   | 7   | 9   | 14  | 11  | 9   | 117   |
| 2004  | 9   | 8   | 15  | 14  | 12  | 6   | 12  | 13  | 11  | 10  | 9   | 8   | 130   |
| 2005  | 4   | 6   | 13  | 8   | 12  | 16  | 9   | 2   | 7   | 2   | 4   | 6   | 99    |
| 2006  | 11  | 9   | 6   | 8   | 14  | 5   | 2   | 12  | 12  | 20  | 11  | 9   | 106   |
| 2007  | 0   | 0   | 4   | 9   | 11  | 7   | 8   | 10  | 8   | 26  | 0   | 0   | 101   |
| 2008  | 7   | 11  | 8   | 13  | 9   | 4   | 11  | 10  | 6   | 11  | 7   | 11  | 100   |
| 2009  | 14  | 11  | 7   | 5   | 7   | 8   | 4   | 10  | 4   | 17  | 14  | 11  | 91    |
| 2010  | 0   | 0   | 3   | 8   | 0   | 7   | 4   | 1   | 4   | 5   | 0   | 0   | 44    |
| 2011  | 2   | 6   | 4   | 7   | 7   | 11  | 10  | 12  | 7   | 8   | 2   | 6   | 90    |
| 2012  | 0   | 9   | 9   | 1   | 10  | 13  | 3   | 2   | 5   | 8   | 0   | 9   | 69    |
| 2013  | 6   | 3   | 5   | 10  | 8   | 7   | 5   | 7   | 0   | 0   | 6   | 3   | 51    |
| 2014  | 9   | 2   | 5   | 10  | 13  | 16  | 15  | 11  | 15  | 15  | 14  | 6   | 131   |
| 2015  | 9   | 15  | 12  | 18  | 3   | 15  | 12  | NA  | NA  | NA  | NA  | NA  | 83    |
| Total | 93  | 112 | 135 | 133 | 136 | 162 | 130 | 123 | 117 | 170 | 103 | 86  | 1500  |

856

857 Table 2. Ozone mixing ratio trends for the median, 5<sup>th</sup> and 95<sup>th</sup> percentiles as shown in Figure 6 (see text for details) in ppbv/year  
 858 (%/year). Statistically significant trends are marked in bold font

< 17-19 km year 5<sup>th</sup> and 95<sup>th</sup>, spring and winter out of order? 7-10km winter out of order? >

|                 | Year                         |                    |                              | Spring                       |                    |                     | Summer                       |                    |                     | Fall                           |                                |                     | Winter                         |                                |                     |
|-----------------|------------------------------|--------------------|------------------------------|------------------------------|--------------------|---------------------|------------------------------|--------------------|---------------------|--------------------------------|--------------------------------|---------------------|--------------------------------|--------------------------------|---------------------|
|                 | Med.                         | 5 <sup>th</sup> P. | 95 <sup>th</sup> P.          | Med.                         | 5 <sup>th</sup> P. | 95 <sup>th</sup> P. | Med.                         | 5 <sup>th</sup> P. | 95 <sup>th</sup> P. | Med.                           | 5 <sup>th</sup> P.             | 95 <sup>th</sup> P. | Med.                           | 5 <sup>th</sup> P.             | 95 <sup>th</sup> P. |
| <b>17-19 km</b> | -0.49<br>(-0.05)             | 0.25<br>(0.05)     | -5.37<br>(-0.37)             | -1.01<br>(-0.1)              | 3.47<br>(0.68)     | -5.89<br>(-0.41)    | -2.93<br>(-0.44)             | -3.25<br>(-0.63)   | -0.13<br>(-0.01)    | <b>-8.79</b><br><b>(-1.39)</b> | <b>-5.80</b><br><b>(-1.26)</b> | -6.58<br>(-0.68)    | -0.12<br>(-0.01)               | 1.37<br>(0.27)                 | -21.86<br>(-1.51)   |
| <b>12-16 km</b> | 1.56<br>(1.01)               | -0.01<br>(-0.01)   | 2.52<br>(0.51)               | 1.10<br>(0.50)               | 0.58<br>(0.19)     | 0.29<br>(0.05)      | 0.08<br>(0.06)               | 0.20<br>(0.30)     | 0.19<br>(0.06)      | -0.83<br>(-0.71)               | -1.12<br>(-1.83)               | -1.49<br>(-0.63)    | 2.54<br>(1.31)                 | 0.51<br>(0.65)                 | 0.95<br>(0.18)      |
| <b>7-10 km</b>  | <b>0.31</b><br><b>(0.57)</b> | 0.01<br>(0.03)     | <b>0.55</b><br><b>(0.54)</b> | <b>0.71</b><br><b>(1.10)</b> | 0.20<br>(0.49)     | 4.31<br>(6.69)      | <b>0.58</b><br><b>(0.98)</b> | 0.27<br>(0.90)     | 1.01<br>(0.95)      | -0.03<br>(-0.06)               | -0.49<br>(1.62)                | 0.18<br>(0.22)      | <b>-0.43</b><br><b>(-0.87)</b> | -0.30<br>(-0.91)               | -1.19<br>(-1.41)    |
| <b>4-7 km</b>   | -0.14<br>(-0.26)             | -0.33<br>(-0.85)   | 0.19<br>(0.17)               | 0.12<br>(0.20)               | -0.29<br>(-0.67)   | 0.96<br>(1.17)      | -0.14<br>(-0.24)             | -0.03<br>(0.09)    | -0.01<br>(-0.01)    | -0.23<br>(0.45)                | -0.82<br>(-2.33)               | 0.26<br>(0.06)      | <b>-0.36</b><br><b>(-0.72)</b> | <b>-0.59</b><br><b>(-1.53)</b> | 0.05<br>(0.08)      |

Formatted: Superscript

Formatted: Superscript

859

Table 3. Number of air parcels ending at TMF during lidar measurements over the period 2000-2015, classified as “Stratosphere”, “Central America”, “ABL”, “AFT” and “Pacific Ocean” (see text for details) [<Spell out ABL and AFT>](#)

|       | <b>Strat</b> | <b>Cent. Am</b> | <b>ABL</b> | <b>AFT</b> | <b>Pac</b> |
|-------|--------------|-----------------|------------|------------|------------|
| 14 km | 1150 (78%)   | 47 (3%)         | 0 (0%)     | 5 (0%)     | 270 (18%)  |
| 13 km | 853 (58%)    | 69 (5%)         | 1 (0%)     | 20 (1%)    | 519 (35%)  |
| 12 km | 515 (35%)    | 86 (6%)         | 4 (0%)     | 61 (4%)    | 798 (54%)  |
| 11 km | 321 (22%)    | 89 (6%)         | 16 (1%)    | 51 (3%)    | 985 (67%)  |
| 10 km | 199 (13%)    | 94 (6%)         | 17 (1%)    | 93 (6%)    | 1058 (71%) |
| 9 km  | 118 (8%)     | 98 (7%)         | 18 (1%)    | 92 (6%)    | 1146 (77%) |
| 8 km  | 70 (5%)      | 103 (7%)        | 19 (1%)    | 82 (6%)    | 1197 (91%) |
| 7 km  | 62 (4%)      | 110 (7%)        | 19 (1%)    | 84 (6%)    | 1194 (81%) |
| 6 km  | 24 (2%)      | 133 (9%)        | 11 (1%)    | 67 (5%)    | 1226 (83%) |
| 5 km  | 31 (2%)      | 161 (11%)       | 12 (1%)    | 87 (6%)    | 1169 (79%) |

**Figure captions:**

Figure 1. a) Profile of the mean relative difference between the lidar and the ECC ozone number density for the 32 simultaneous measurements (dark blue). Lidar uncertainty (light blue) and mean relative difference obtained between 4 and 16 km (red dotted line) are superimposed. The black solid curve shows the number of data points at each altitude. b) Histogram of the difference between the lidar and the ECC ozone number density. c) Column-averaged (below 8 km) difference between the lidar and the ECC sonde for each coincidence

Figure 2. a) Composite monthly mean surface ozone at TMF and nearby ARB stations obtained from hourly samples (left) and 8hMDA values (right) for the period 2013-2015. b) Composite mean ozone daily cycle at TMF and nearby ARB stations for the four seasons for the period 2013-2015

Figure 3. a) Ozone mixing ratio climatological average (2000-2015) computed from the TMF lidar measurements (red curve). The cyan horizontal bars indicate the standard deviation at intervals of 1-km. The red dot at the bottom indicates the mean surface ozone mixing ratio (2013-2015) measured simultaneously with lidar. b) Seasonally-averaged ozone mixing ratio profiles for spring (MAM), summer (JJA), fall (SON) and winter (DJF). The dots at the bottom indicate the corresponding surface ozone seasonal averages

Figure 4. Composite monthly mean ozone mixing ratio (2000-2015) computed from the TMF lidar measurements. The dashed line indicates the climatological tropopause above the site (WMO definition). Bottom strip: Composite monthly mean ozone mixing ratio (2000-2015) from the surface measurements

Figure 5. Deseasonalized ozone mixing ratio above TMF. Anomalies (in %) were computed with respect to the climatological (2000-2015) monthly mean



Figure 6. Time series of the median (blue), 5<sup>th</sup> (orange) and 95<sup>th</sup> (yellow) percentile ozone values at different altitude layers for the full year (top) and for selected seasons and altitude layers (bottom) obtained from the TMF lidar measurements. Dashed lines represent the linear fit for each time series

Figure 7. Geographical boundaries used to characterize the air parcels associated with the 8-day backward trajectories ending at TMF during the lidar measurements over the period 2000-2015

Figure 8. Examples of HYSPLIT 8-day backward trajectories arriving at TMF at 7 km altitude for four selected seasons and categories (see text for details)

Figure 9. Distribution of the five categories identified for each trajectory ending at TMF during the lidar measurements over the period 2000-2015. The number of occurrences is given for each month of the year, and for four different altitude layers

Figure 10. Box plot of the ozone mixing ratios measured within the air masses arriving at TMF at 9 km for the five identified categories (see text for details) and the four seasons. The black dot represents the mean value, the red line is the median and the box limits correspond to the 25<sup>th</sup> and 75<sup>th</sup> percentiles. The numbers between parentheses indicate the number of associated trajectories. [<ST mean values in Sp. Summer and Winter look high. Summer AFT mean looks high.>](#)

Figure 11. Composite profiles of the ozone mixing ratio associated with the different categories and for each season. Results are shown only when the number of samples for a given category was larger than 5% of the total number of samples in that season

Figure 12. Monthly distribution of occurrences (in %) of double tropopauses above TMF. The number of days with tropopause folds is normalized to the total number of measurements per month compiled in Table 1

Figure 13. a) to d) Altitude distribution of the tropopause above TMF for spring, summer, fall and winter respectively, and in the absence of double-tropopause. e) to h) Altitude distribution of the lower (first) tropopause above TMF for spring, summer, fall and winter respectively, and in the presence of a double-tropopause. i) to l) Same as e) to h) but for the upper or second tropopause. All computations were made at the times of the TMF lidar measurements

Figure 14. Winter- (cyan) and Spring- (red) averaged ozone mixing ratio profiles computed in the presence of a double tropopause (DT, solid curves) and single tropopause (ST, dashed curves). The horizontal solid grey curves depicts the average altitude of the lower and upper tropopauses when a double tropopause was identified. The horizontal dashed grey line corresponds to the average altitude of the tropopause when a single tropopause was identified. b) Same as a) but zoomed on the tropospheric part of the profiles (4-10 km)

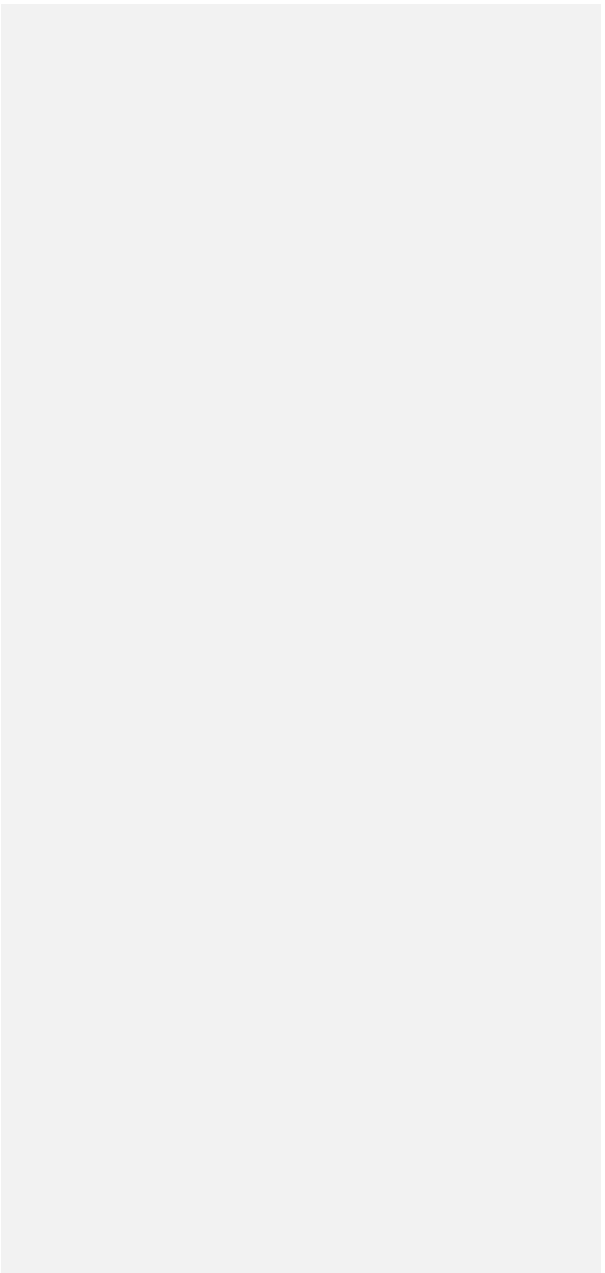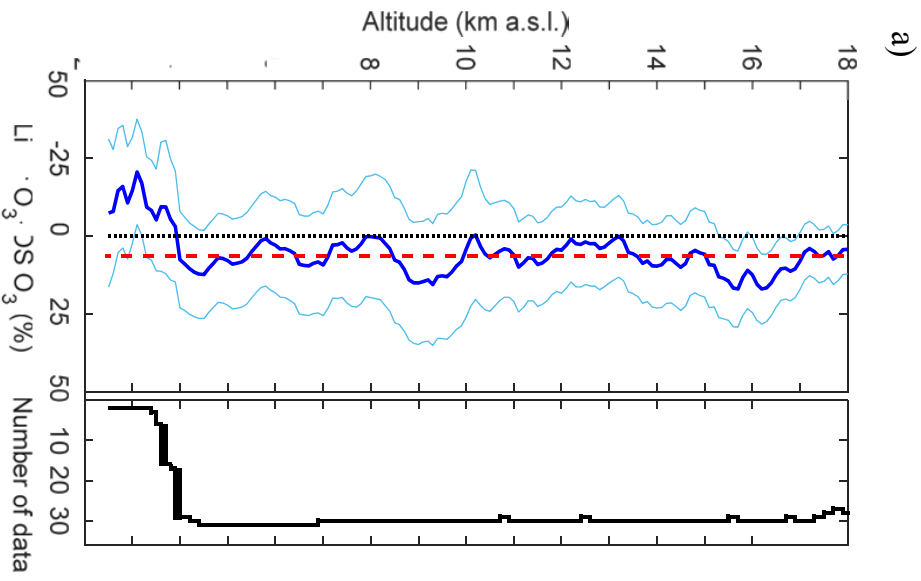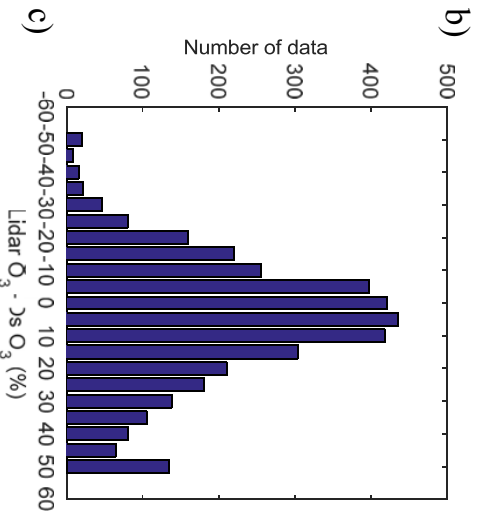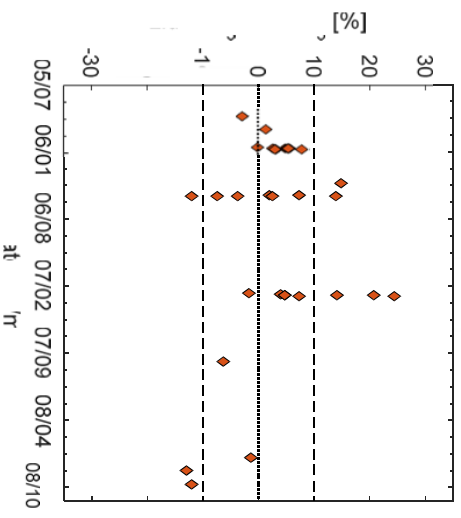

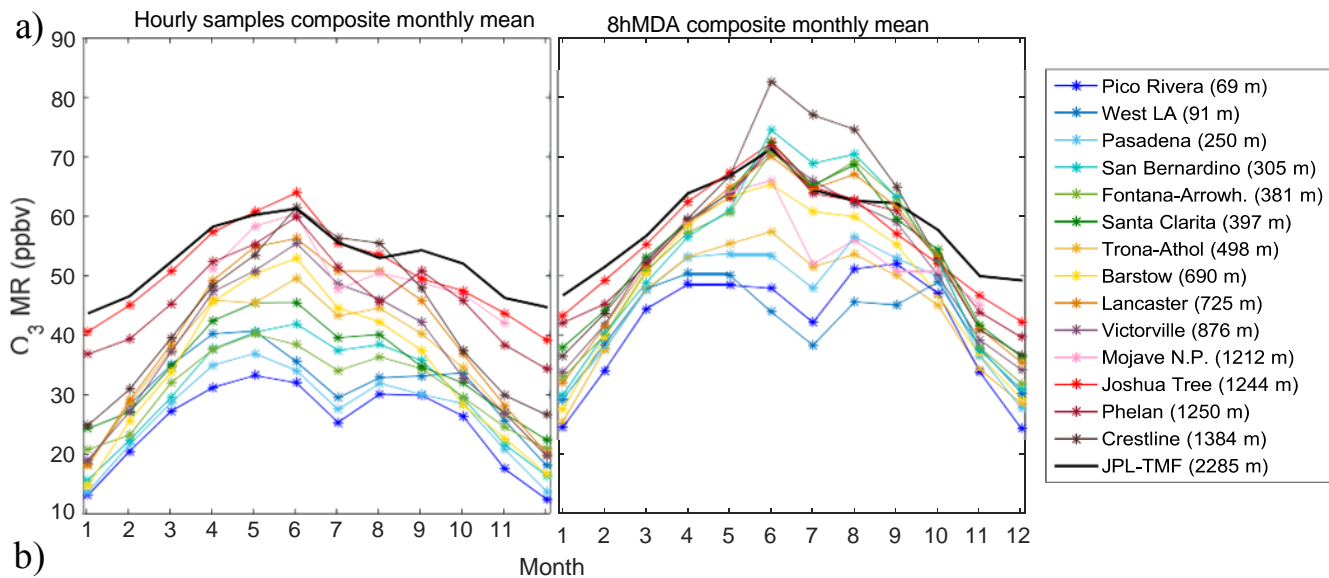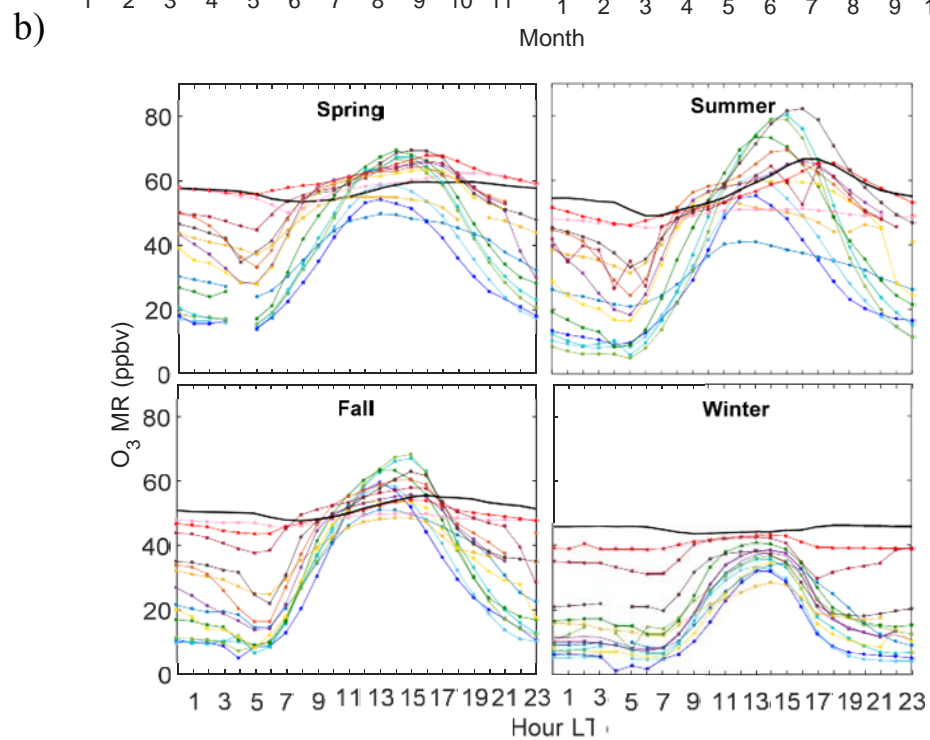

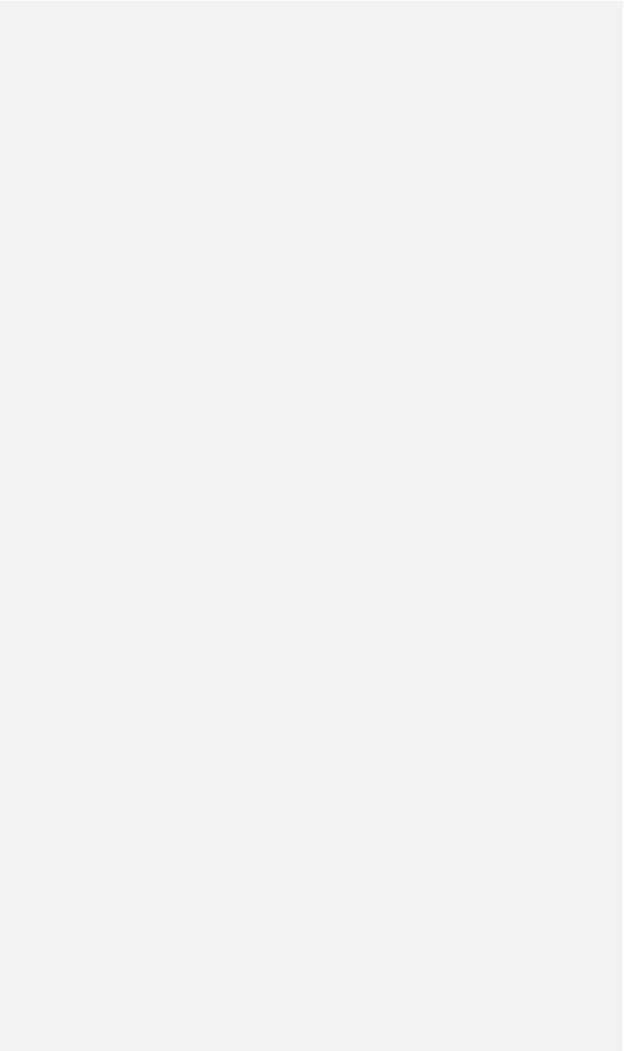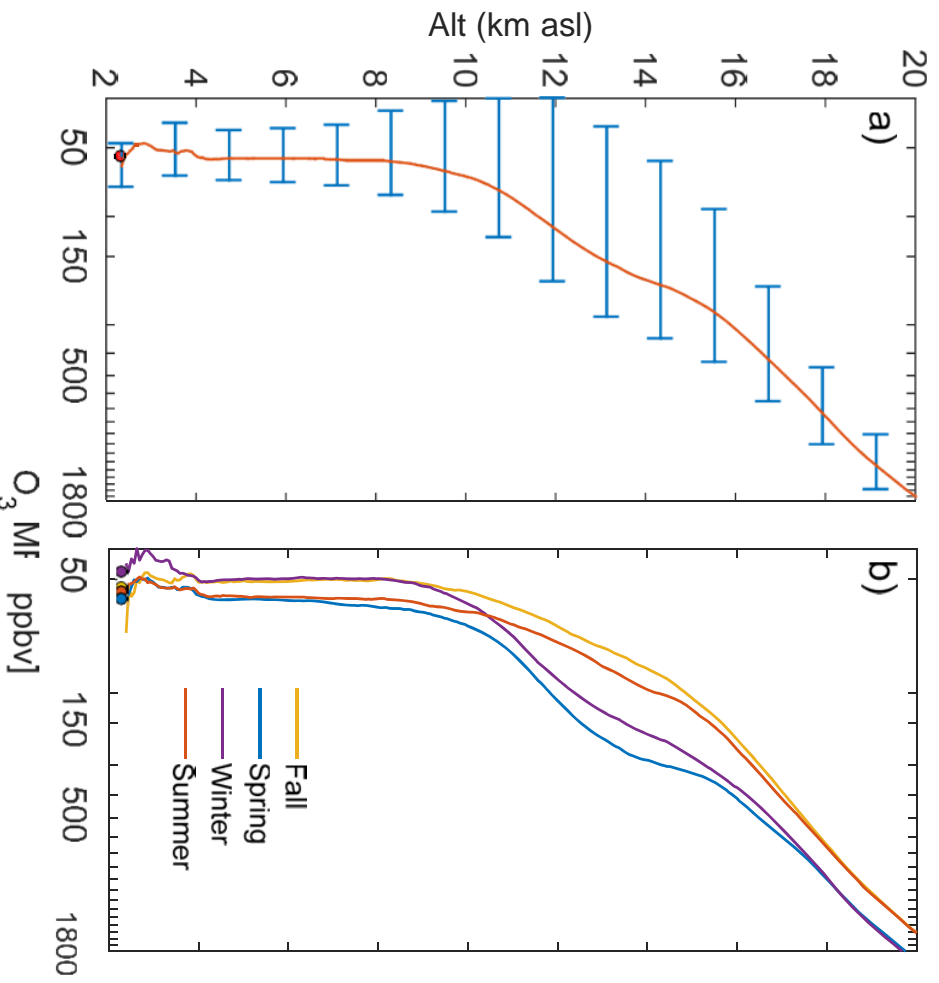

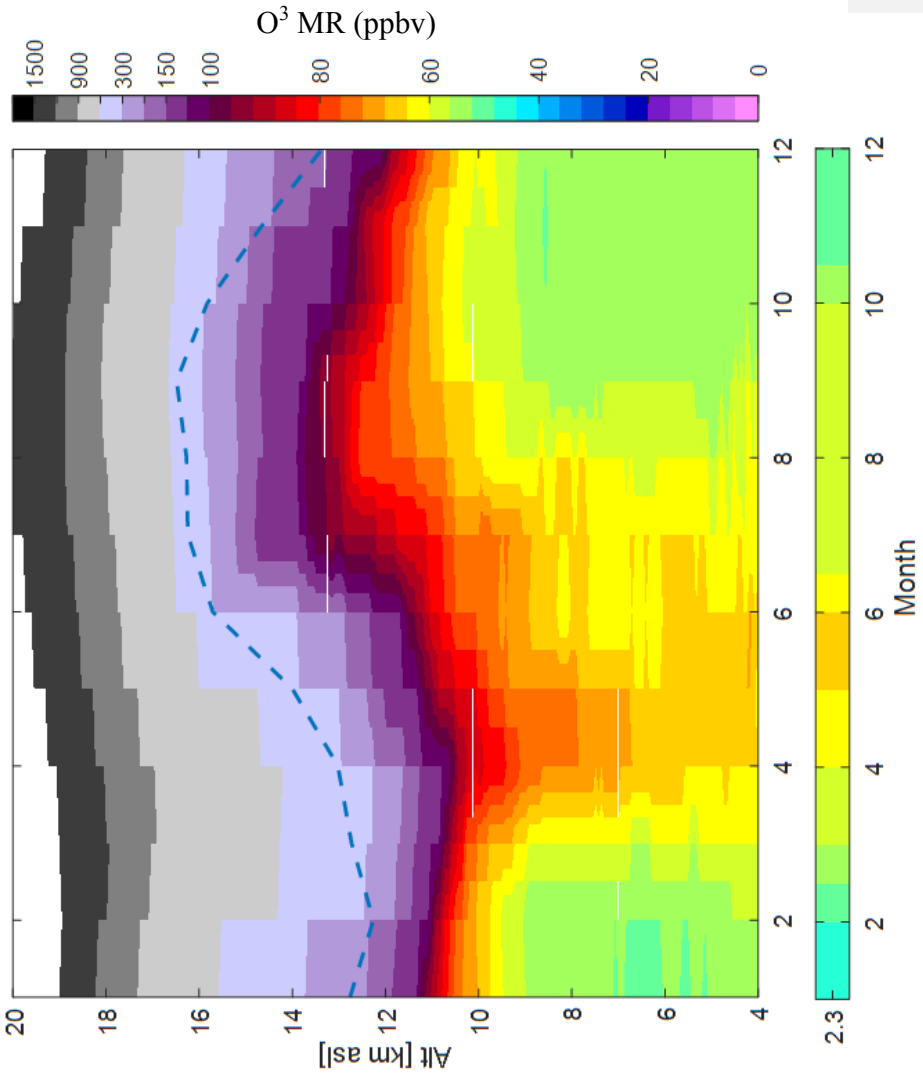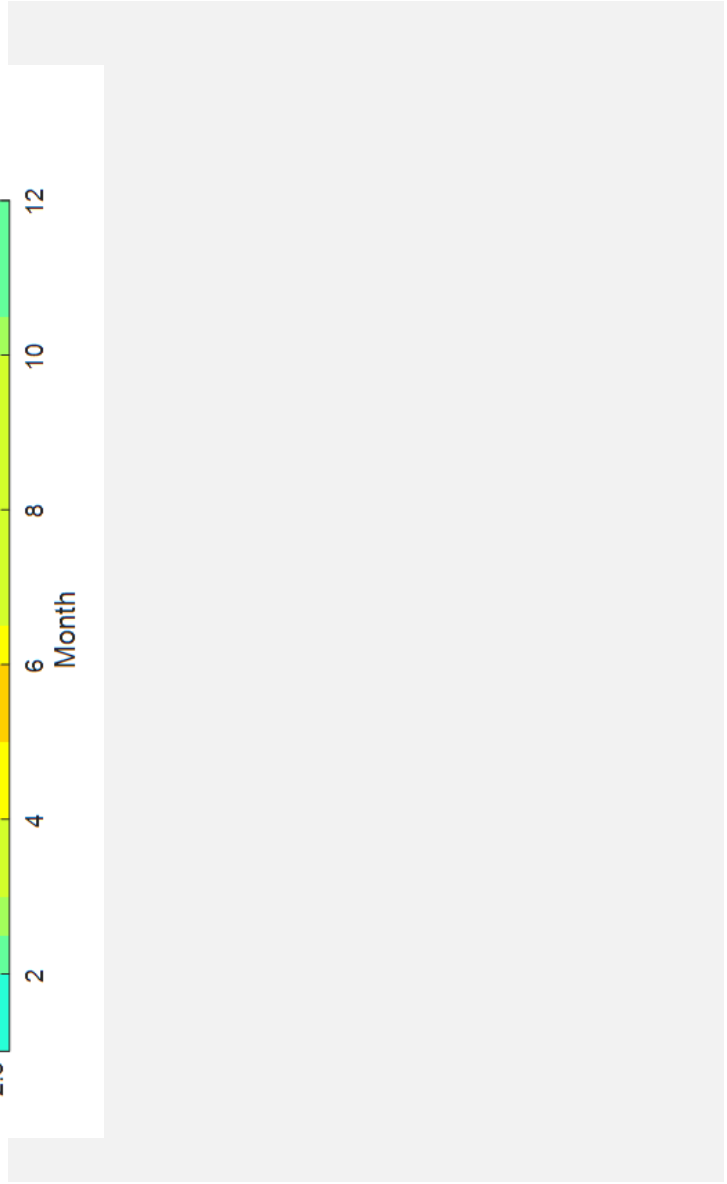

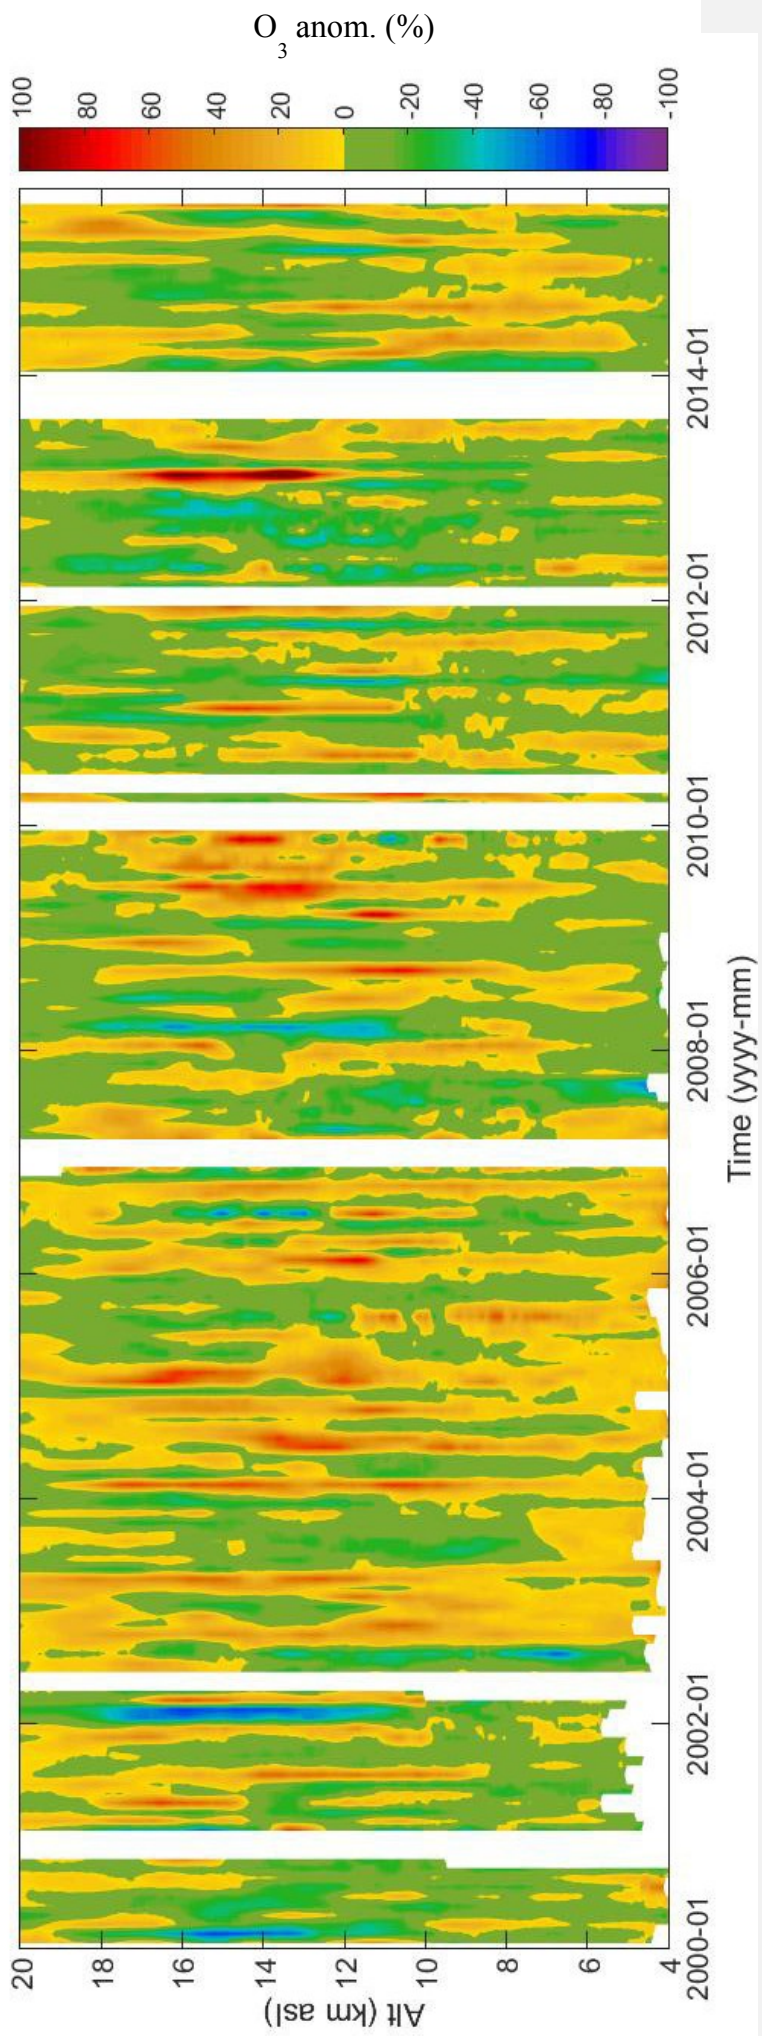

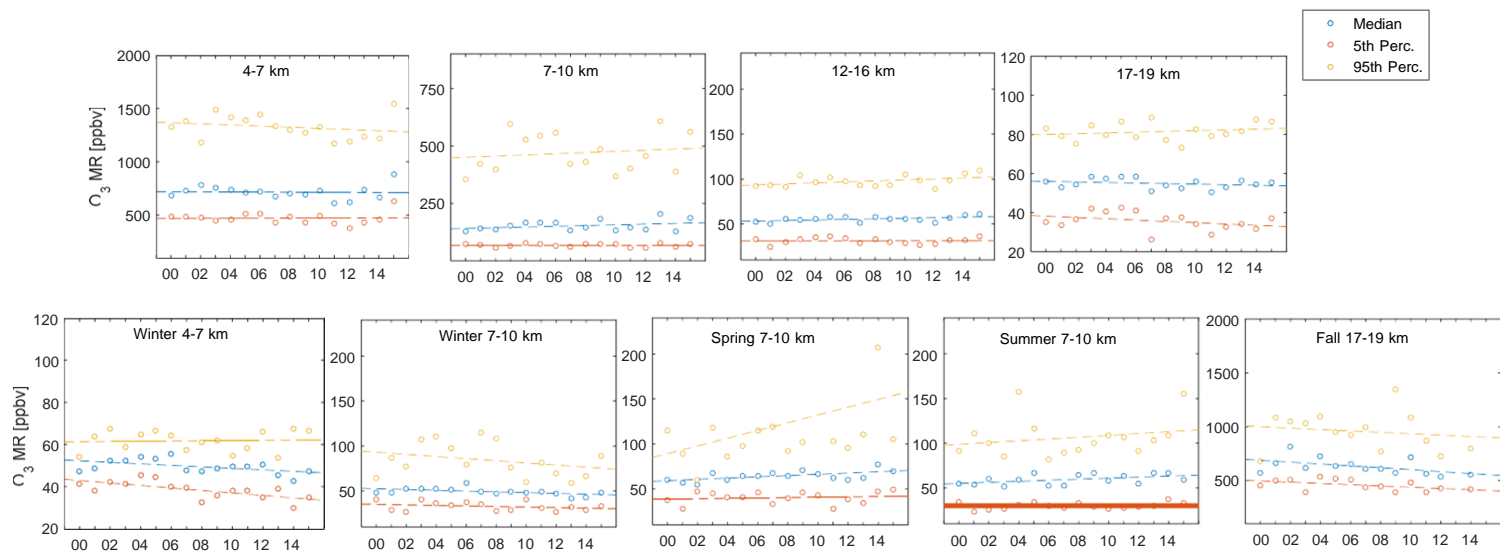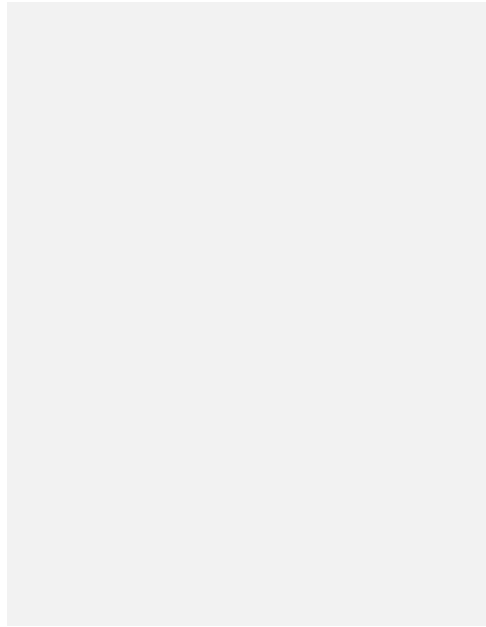

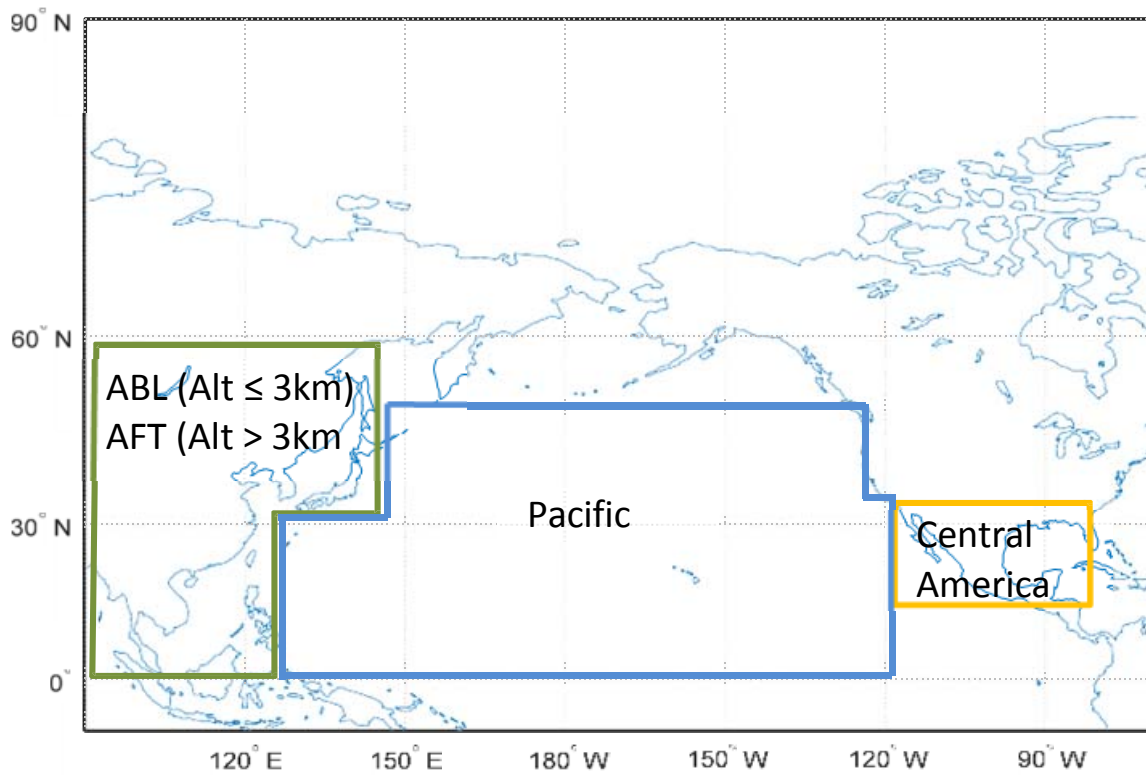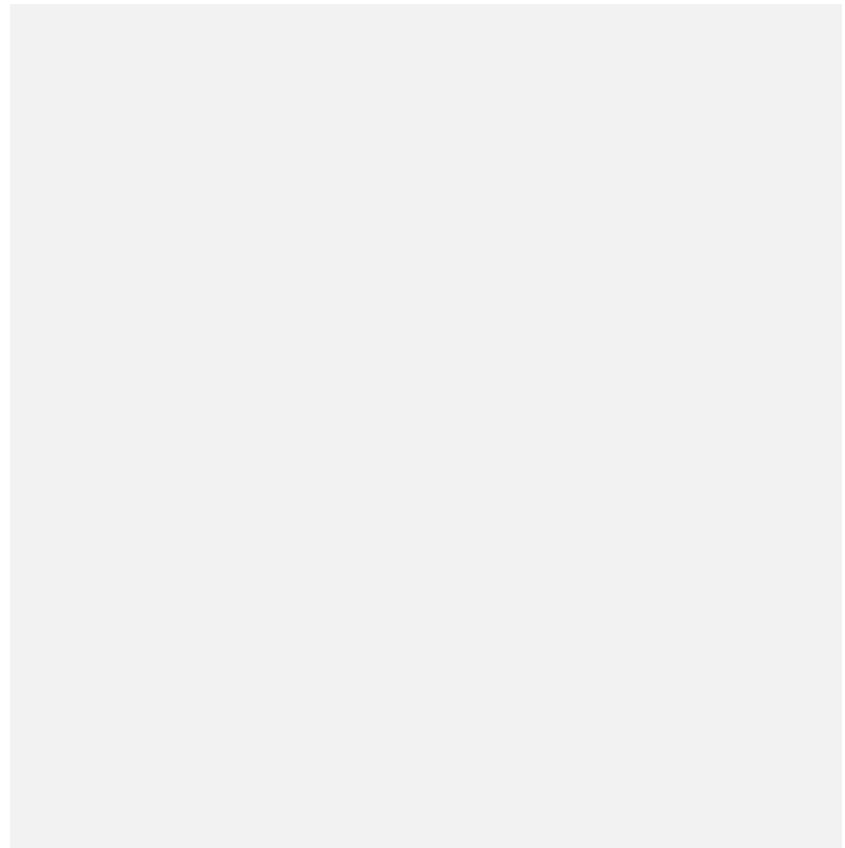



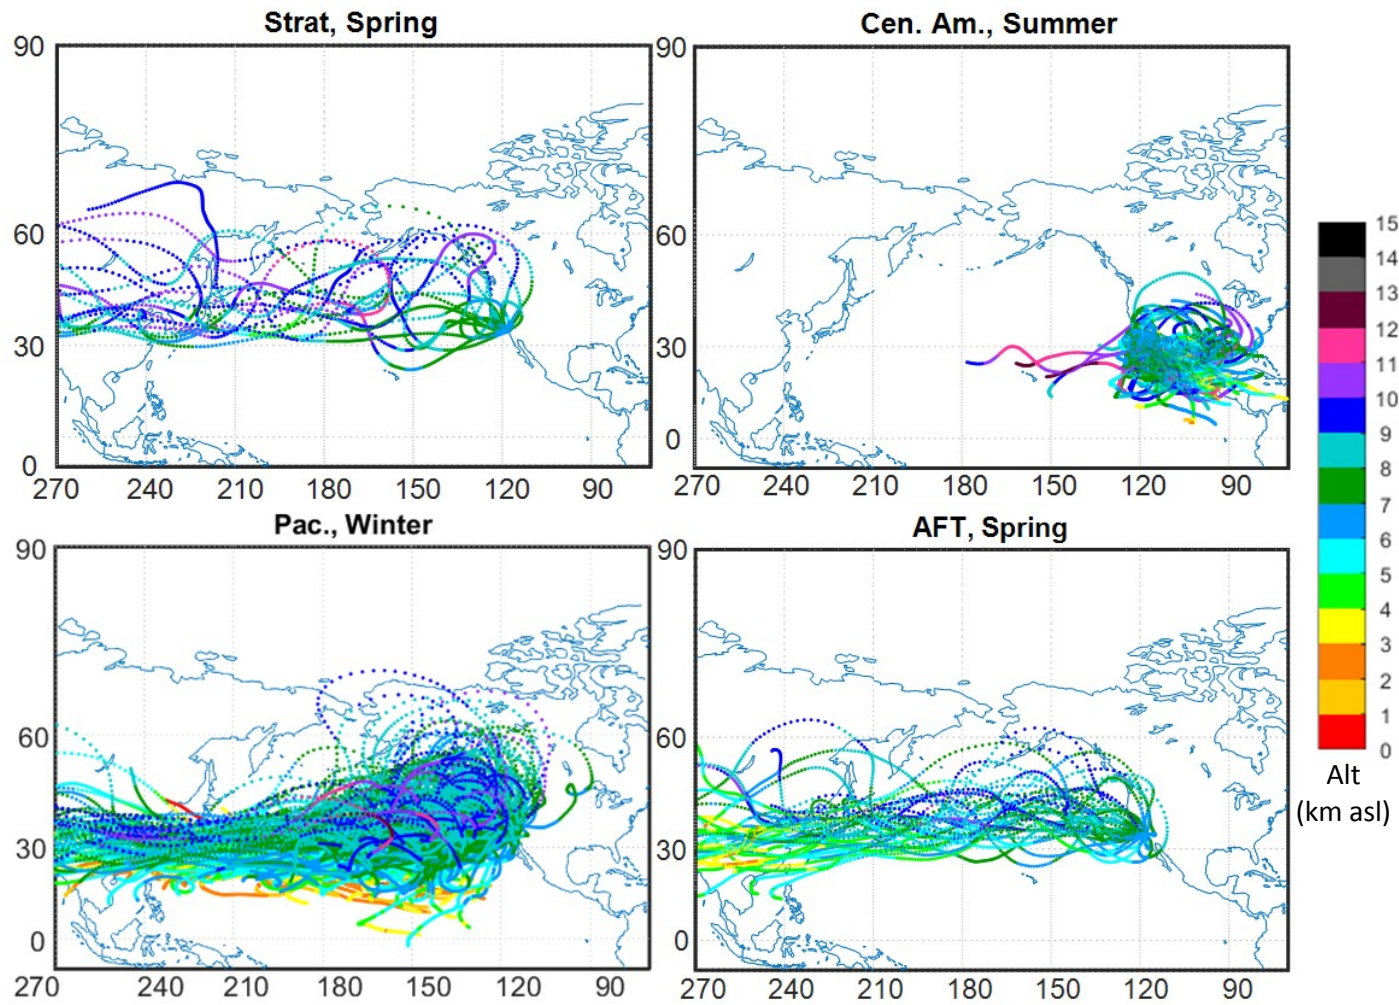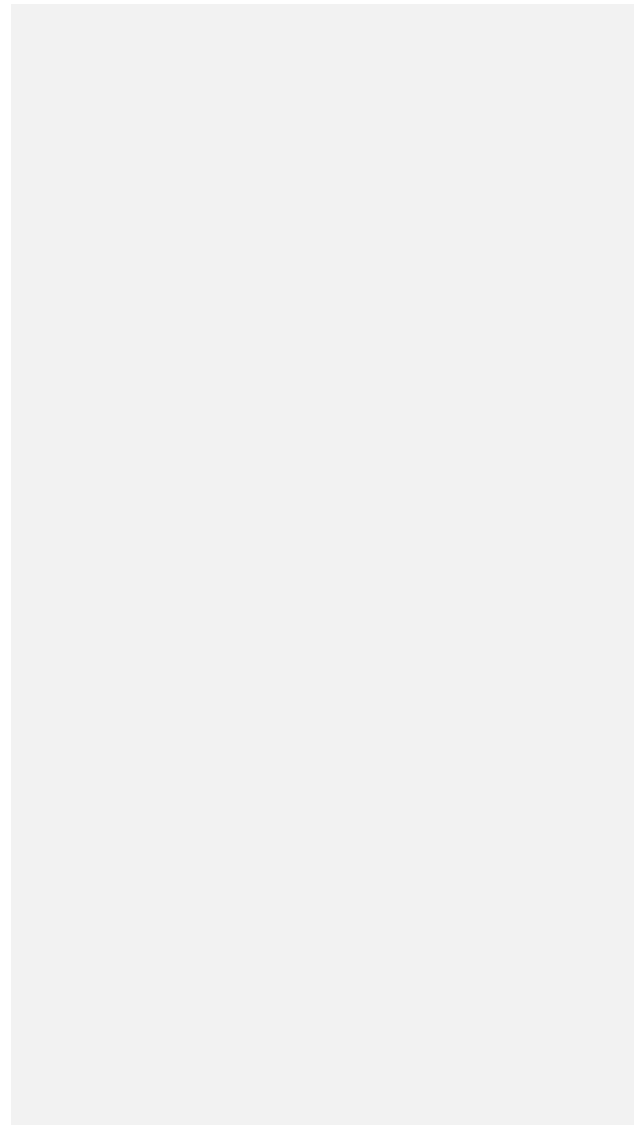

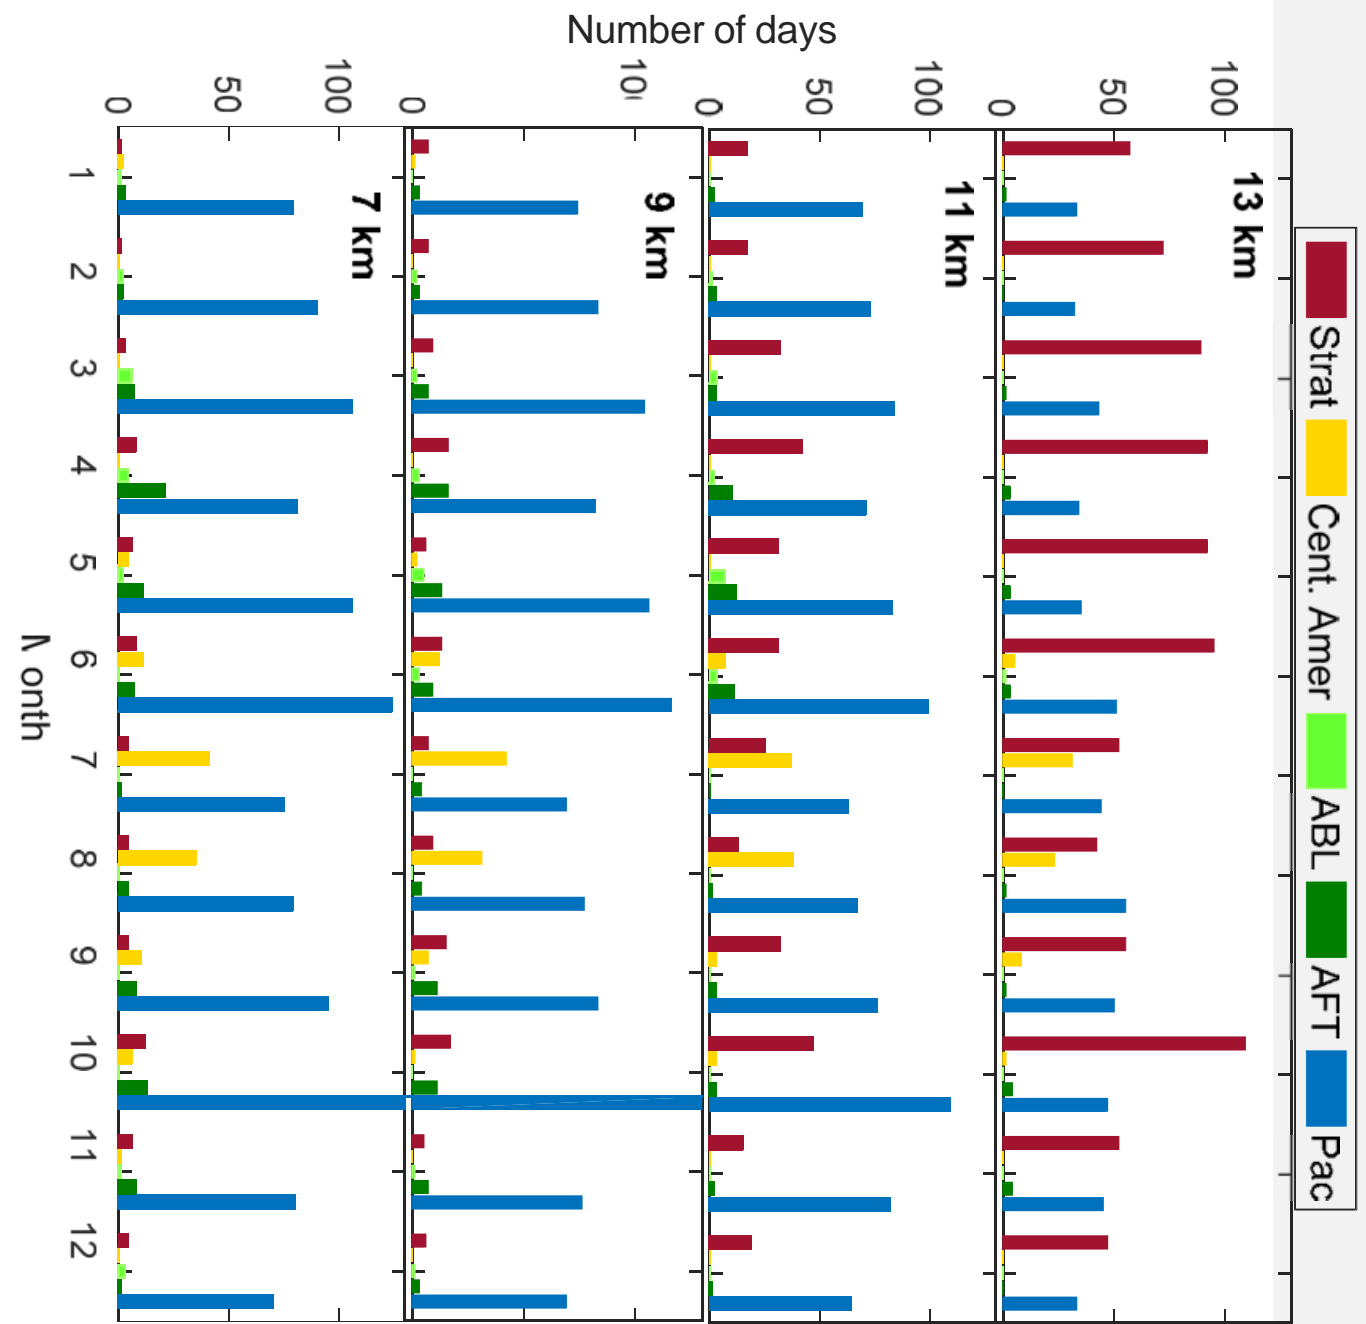

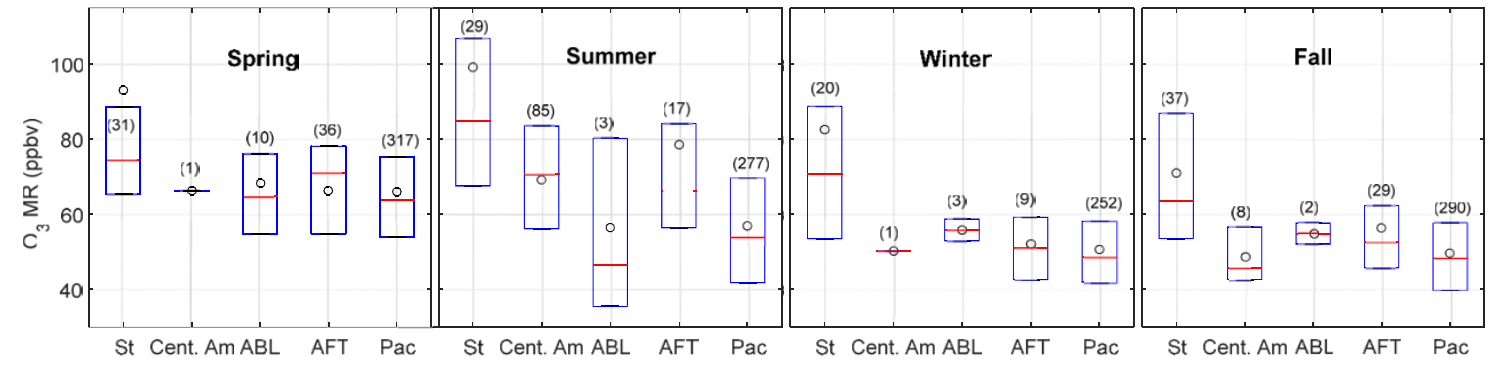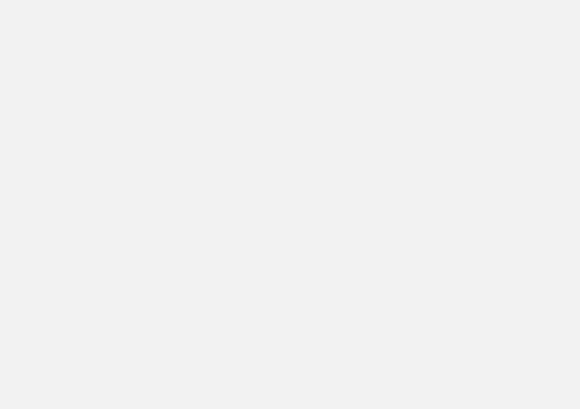

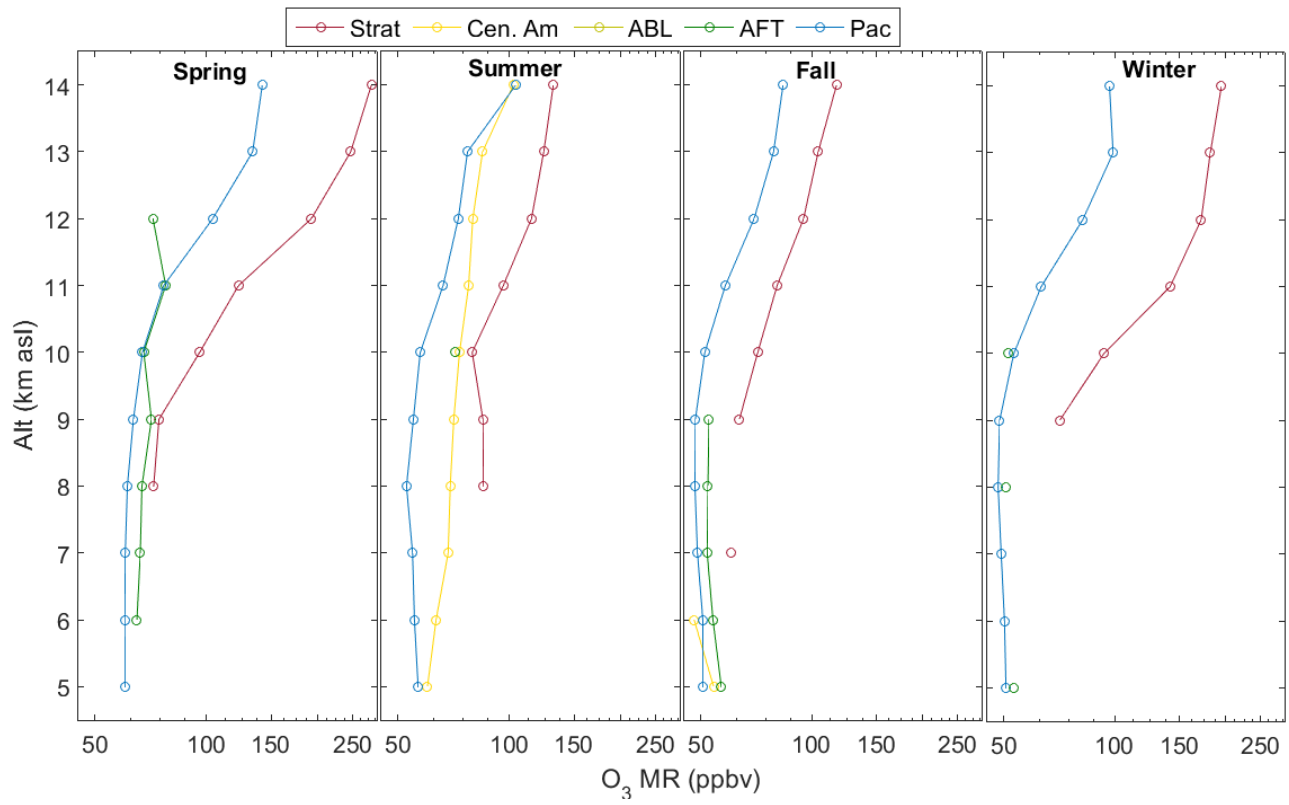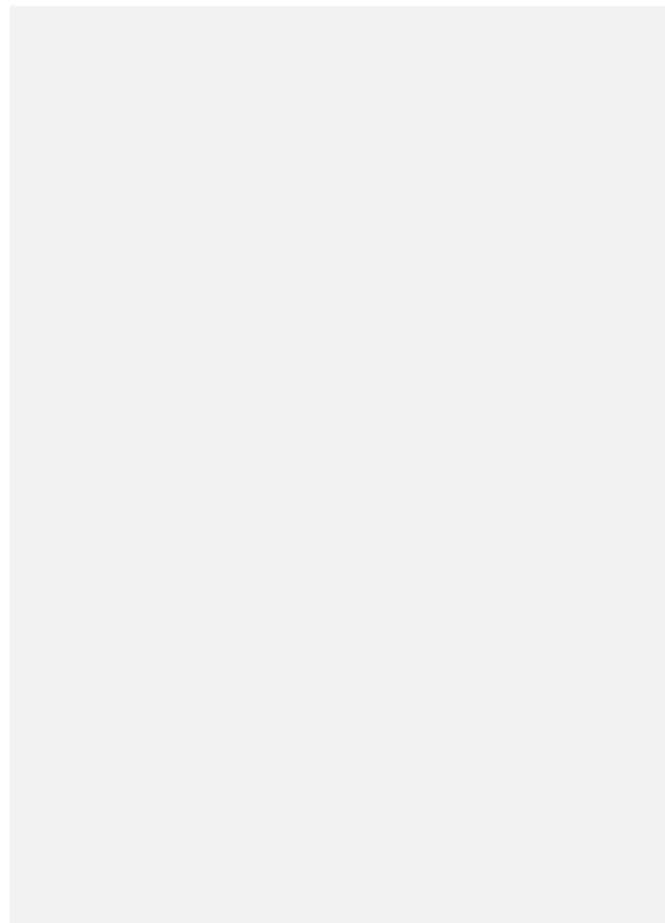

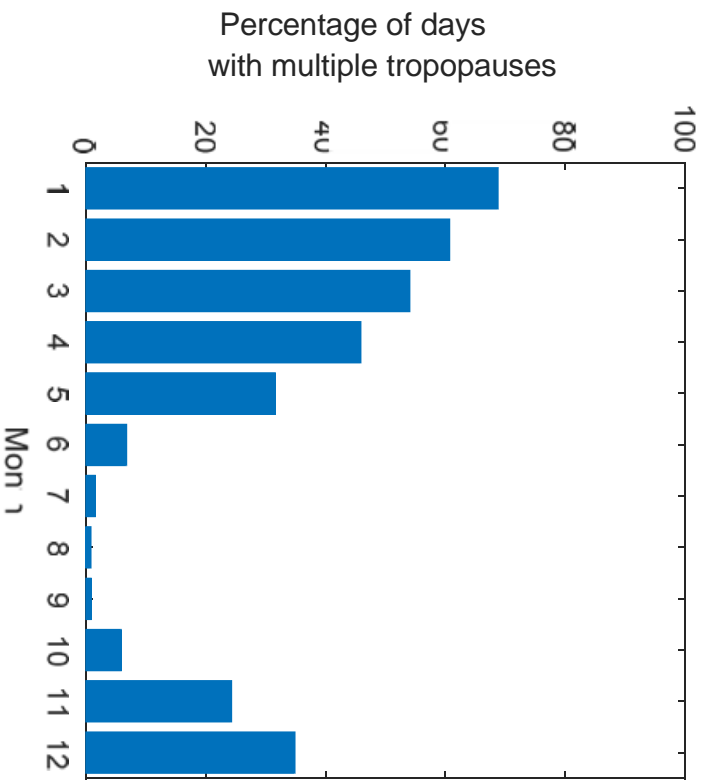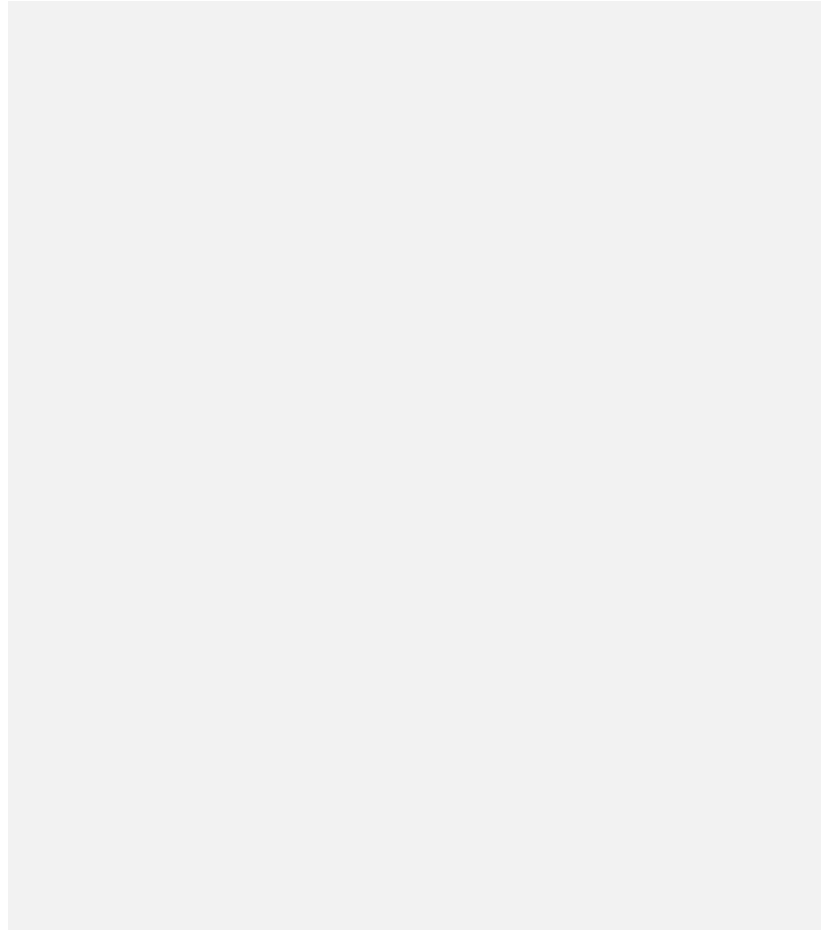

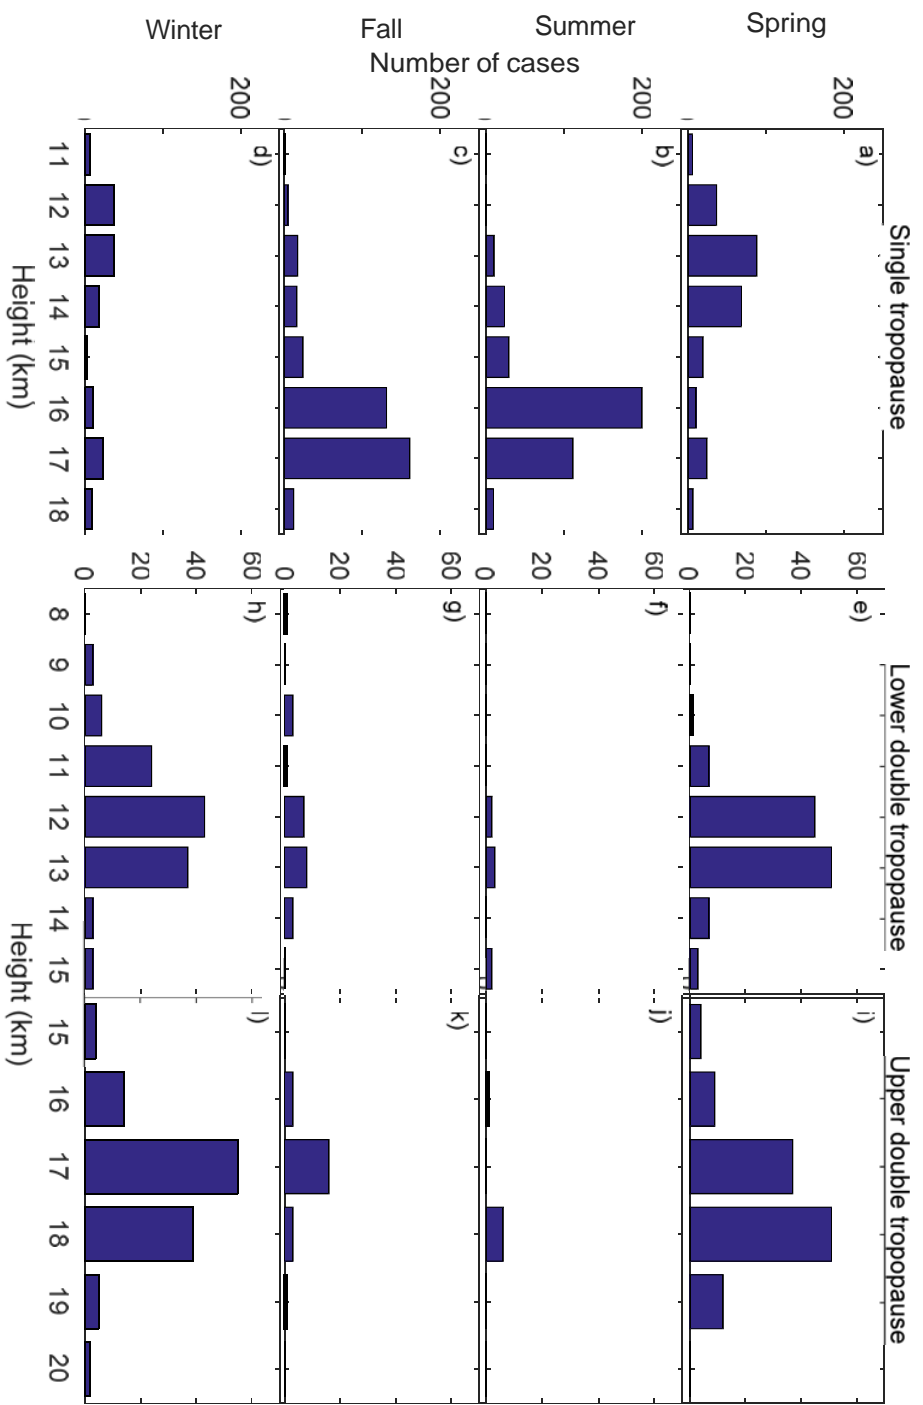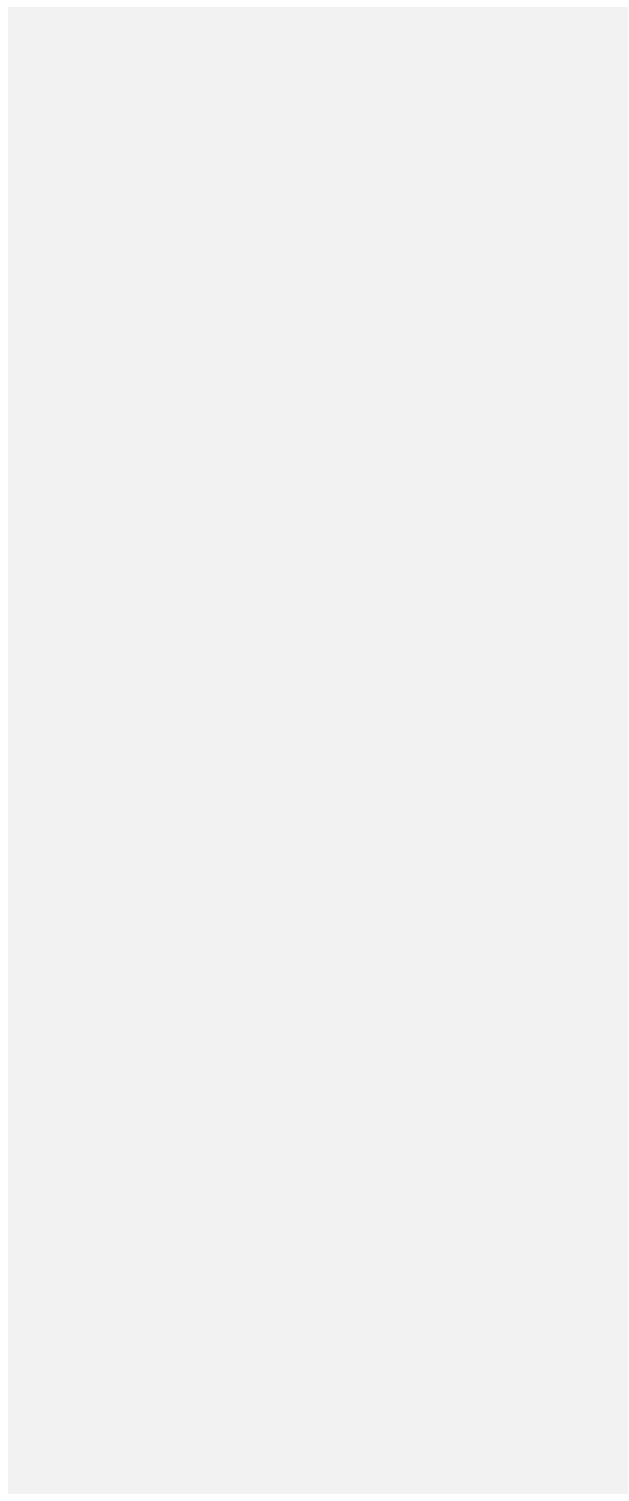

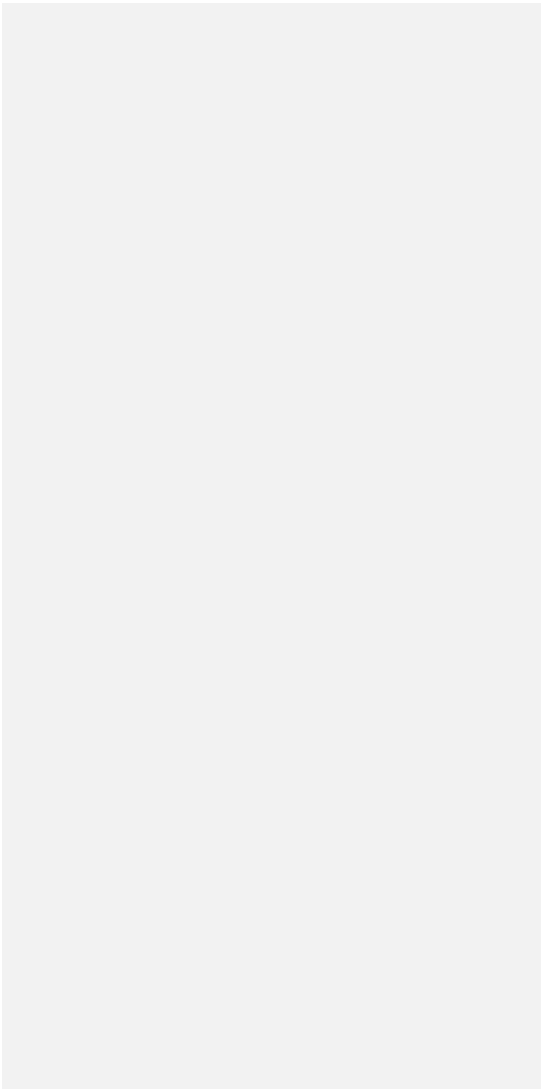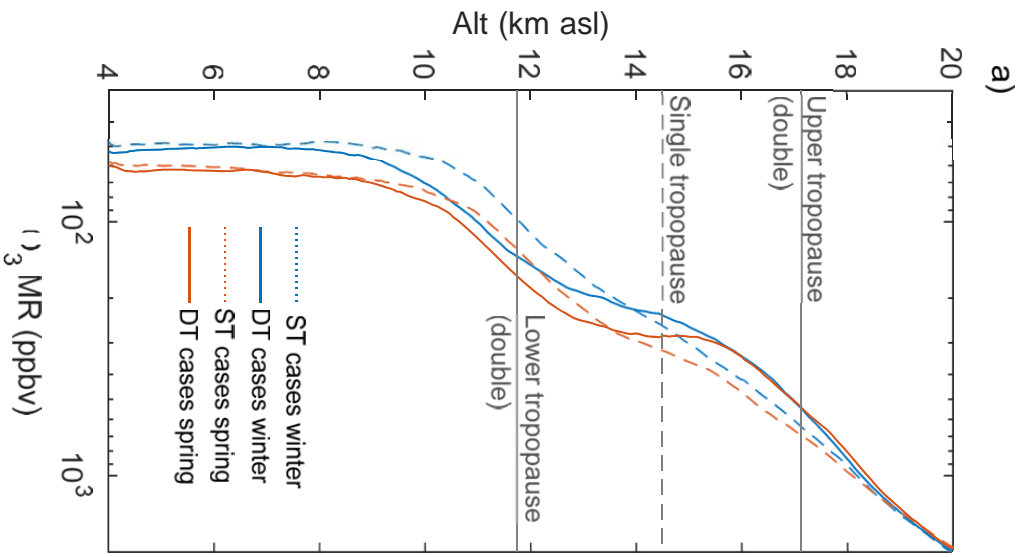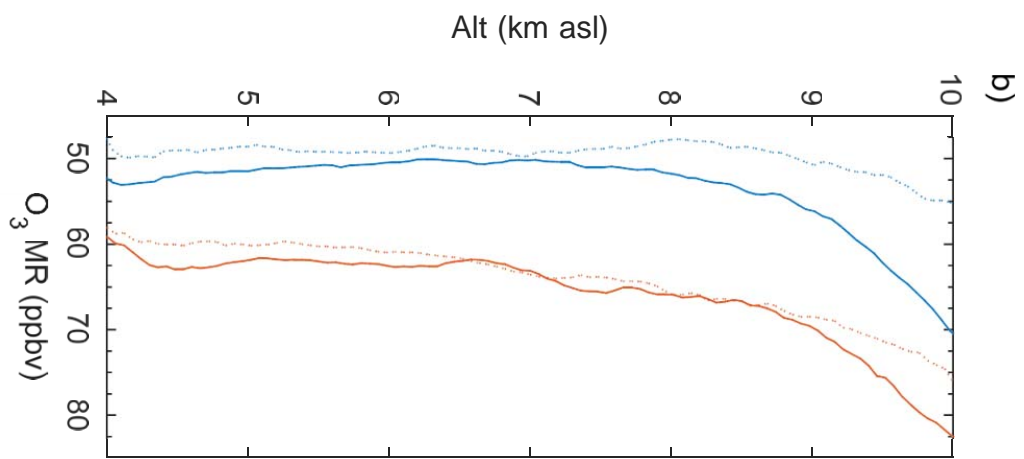

Newchurch, M. J., M. A. Ayoub, S. Oltmans, B. Johnson, and F. J. Schmidlin (2003), Vertical distribution of ozone at four sites in the United States, *J. Geophys. Res.*, *108*(D1), 4031.

Proffitt, M. H., and A. O. Langford (1997), Ground-based differential absorption lidar system for day or night measurements of ozone throughout the free troposphere, *Appl. Opt.*, *36*(12), 2568-2585.

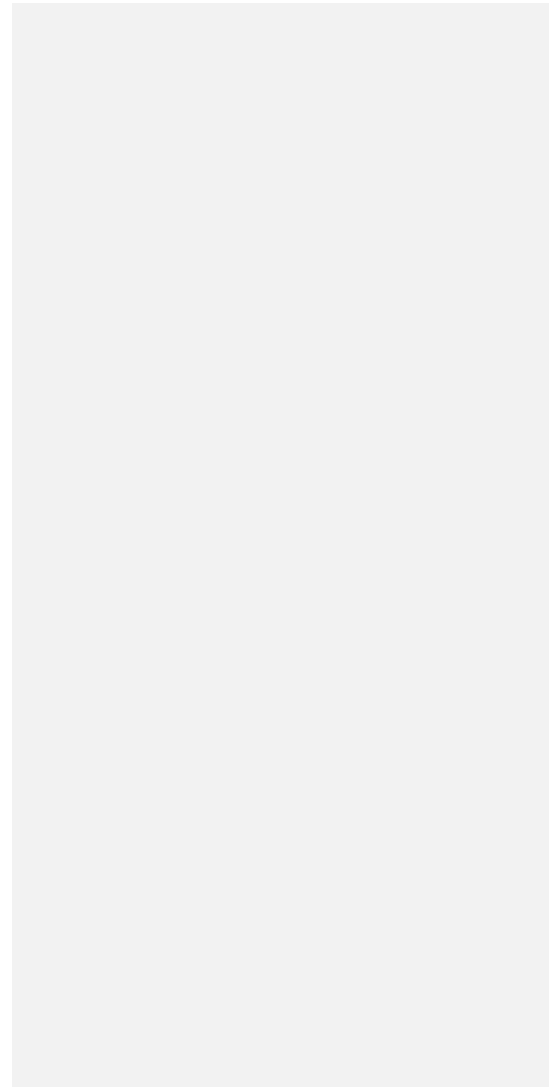

Supplement: Supplementary file [file acp-2016-70-RC2-supplement.pdf]
